# Supplementary material
Source: Royal Society of Chemistry journal article supplement (doi:10.1039/d6ta02261h)
Supplement: d6ta02261h2.pdf [file d6ta02261h2.pdf]

# Contents

|                                                                                                                                                                 |     |
|-----------------------------------------------------------------------------------------------------------------------------------------------------------------|-----|
| <b>Fig S1.</b> $^1\text{H}$ NMR spectrum of soluble fraction from the polymerization of <b>1</b> .....                                                          | S2  |
| <b>Fig S2.</b> $^{13}\text{C}$ NMR spectrum of soluble fraction from the polymerization of <b>1</b> .....                                                       | S3  |
| <b>Fig S3.</b> $^{31}\text{P}$ NMR spectrum of soluble fraction from the polymerization of <b>1</b> .....                                                       | S4  |
| <b>Fig S4.</b> $^{31}\text{P}$ $\{^1\text{H}\}$ NMR spectrum of soluble fraction from the polymerization of <b>1</b> .....                                      | S5  |
| <b>Fig S5.</b> MALDI spectrometric analysis from soluble fraction from the polymerization of <b>1</b> , showing corresponding peaks for <b>2</b> .....          | S6  |
| <b>Fig S6.</b> MALDI spectrometric analysis from soluble fraction from the polymerization of <b>1</b> , showing corresponding peaks for <b>3</b> .....          | S7  |
| <b>Fig S7.</b> MALDI spectrometric analysis from soluble fraction from the polymerization of <b>1</b> , showing corresponding peaks for <b>7</b> .....          | S8  |
| <b>Fig S8.</b> Comparable perspective of $^{13}\text{C}$ CP MAS NMR spectra of polymer <b>5</b> , measured at 14 T at 10 and 12 kHz spinning, respectively..... | S9  |
| <b>Fig S9.</b> Comparable perspective of $^{31}\text{P}$ CP MAS NMR spectra of polymer <b>5</b> , measured at 14 T at 10 and 12 kHz spinning, respectively..... | S9  |
| <b>Fig S10.</b> $^{31}\text{P}$ CP MAS NMR spectra of polymer <b>5</b> , measured 14 T at 12 kHz spinning.....                                                  | S10 |
| <b>Fig S11.</b> $^{31}\text{P}$ $J$ -resolved NMR spectrum of polymer <b>5</b> , measured at 12 kHz spinning.....                                               | S10 |
| <b>Fig S12.</b> Solid state ATR-IR spectrum of polymer <b>5</b> .....                                                                                           | S11 |
| <b>Fig S13.</b> $^{31}\text{P}$ $J$ -resolved NMR spectrum of Wilkinson-Catalyst, measured at 12 kHz spinning.....                                              | S12 |
| <b>Fig S14.</b> $^{13}\text{C}$ CP MAS NMR spectra of <b>1</b> (in black) and polymer <b>6</b> (in red), measured at 8 kHz spinning.....                        | S12 |
| <b>Fig S15.</b> $^{31}\text{P}$ CP MAS NMR spectra of <b>1</b> (in black) and polymer <b>6</b> (in red), measured at 10 kHz spinning.....                       | S13 |
| <b>Fig S16.</b> $^{31}\text{P}$ CP MAS NMR spectrum of polymer <b>6</b> , measured at 12 kHz spinning.....                                                      | S13 |
| <b>Fig S17.</b> $^{31}\text{P}$ $J$ -resolved NMR spectrum of polymer <b>6</b> , measured at 12 kHz spinning.....                                               | S14 |
| <b>Fig S18.</b> $^{31}\text{P}$ sostapt spectra of polymer <b>6</b> , measured at 12 kHz spinning.....                                                          | S14 |
| <b>Fig S19.</b> Solid state ATR-IR spectrum of polymer <b>6</b> .....                                                                                           | S15 |
| <b>Fig S20.</b> $^1\text{H}$ spectroscopic analysis from the crude of polymerization reaction of $\text{Fc}'(\text{P}^t\text{Bu}_2)_2$ .....                    | S16 |
| <b>Fig S21.</b> $^{13}\text{C}$ spectroscopic analysis from the crude of polymerization reaction of $\text{Fc}'(\text{P}^t\text{Bu}_2)_2$ .....                 | S17 |
| <b>Fig S22.</b> $^{31}\text{P}\{^1\text{H}\}$ spectroscopic analysis from the crude of polymerization reaction of $\text{Fc}'(\text{P}^t\text{Bu}_2)_2$ .....   | S18 |
| <b>Fig S23.</b> MALDI spectrometric analysis from soluble fraction from polymerization reaction of $\text{Fc}'(\text{PtBu}_2)_2$ .....                          | S19 |
| <b>Fig S24.</b> MALDI (HRMS) spectrometric analysis for $\text{Fc}'(\text{tBu})$ .....                                                                          | S20 |
| <b>Fig S25.</b> Kohn–Sham frontier molecular orbitals and corresponding energy levels (in eV) for compound <b>1</b> and the oligomeric model system.....        | S21 |
| <b>Fig S26.</b> Solid state UV-Vis spectra of compound <b>1</b> .....                                                                                           | S21 |
| <b>Scheme S1.</b> The cleavage of the P–C(tBu) bond in cases of <b>1</b> and <b>8</b> .....                                                                     | S22 |
| <b>Scheme S2.</b> The cleavage of the Fc–P bond in cases of <b>1</b> and <b>8</b> .....                                                                         | S22 |
| <b>Scheme S3.</b> The investigated alternative pathways.....                                                                                                    | S26 |
| <b>Scheme S4.</b> The considered reaction paths result in volatile phosphorus-containing products.....                                                          | S29 |
| <b>Scheme S5.</b> Thermodynamic profile of the thermal decomposition pathways of $\text{Fc}'(\text{PtBu}_2)_2$ .....                                            | S29 |
| <b>References</b> .....                                                                                                                                         | S30 |

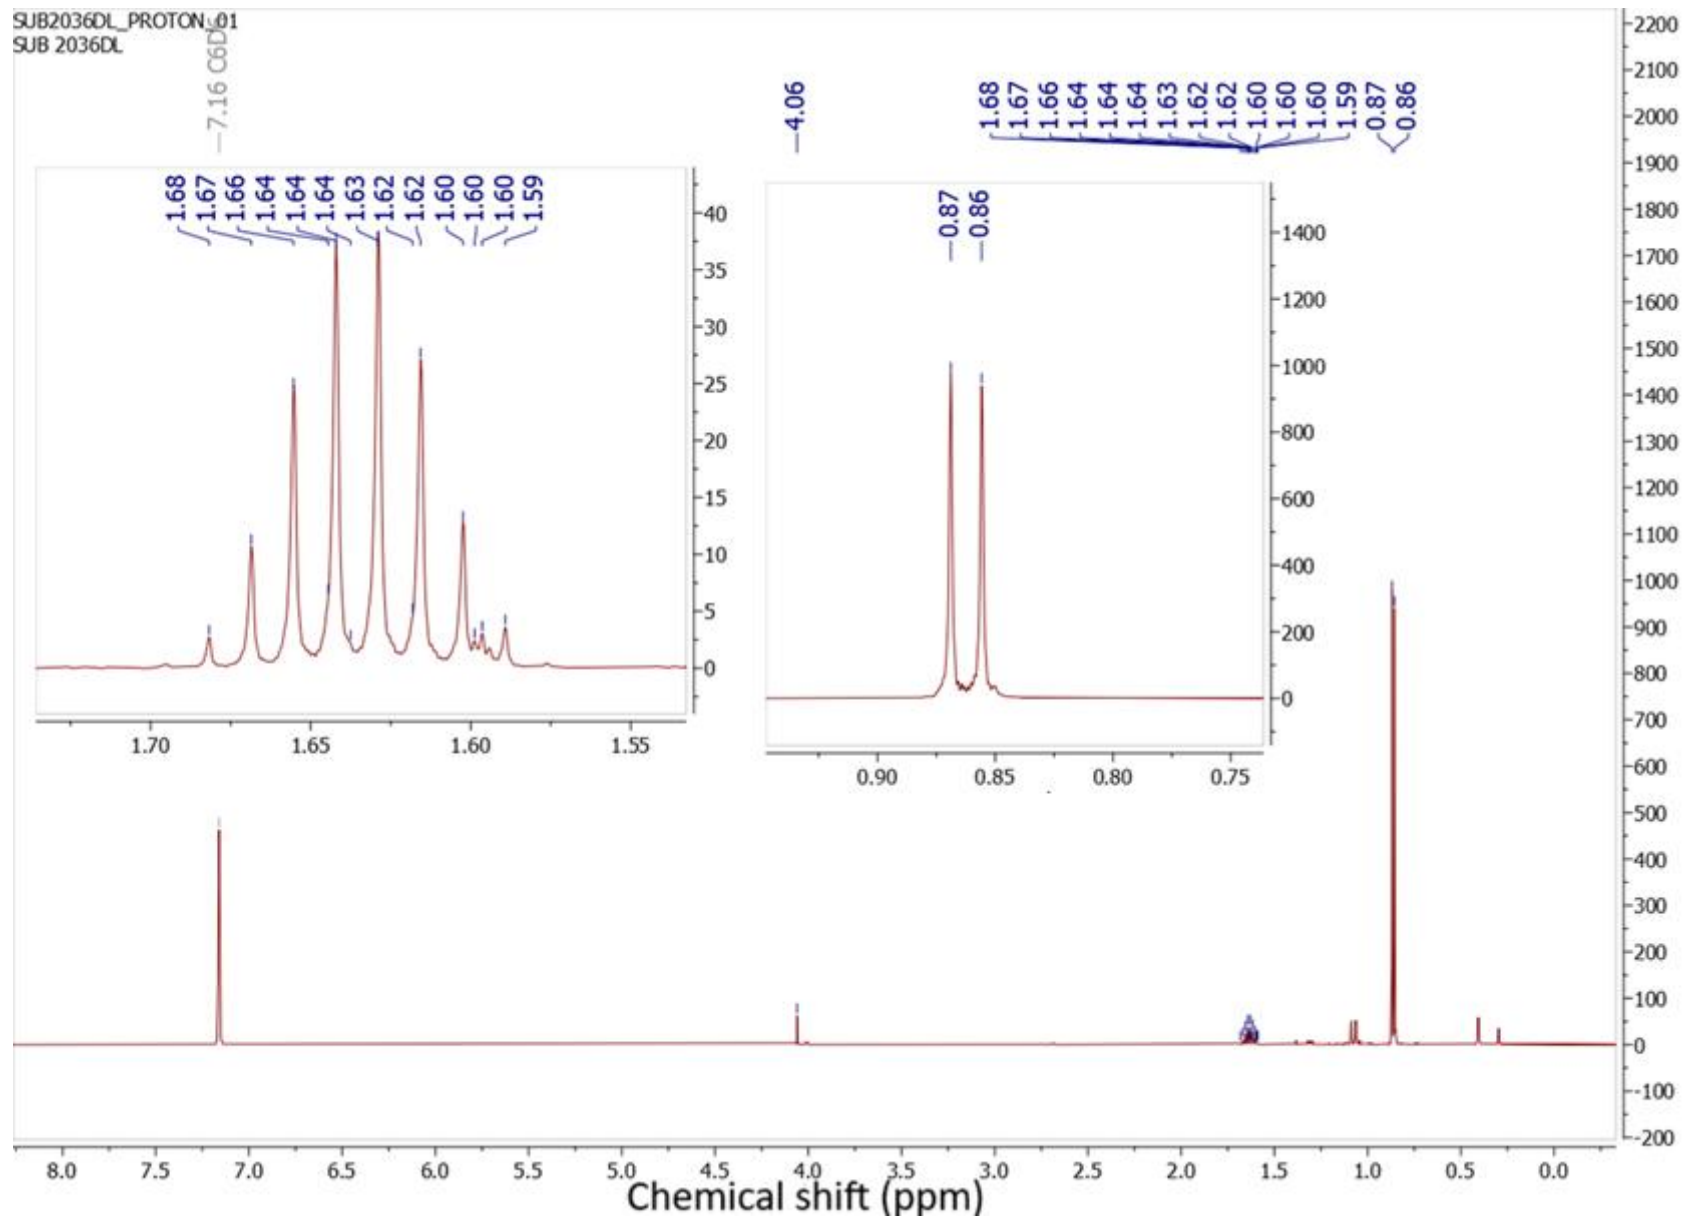

**Fig S1.**  $^1\text{H}$  NMR spectrum of soluble fraction from the polymerization of **1**.

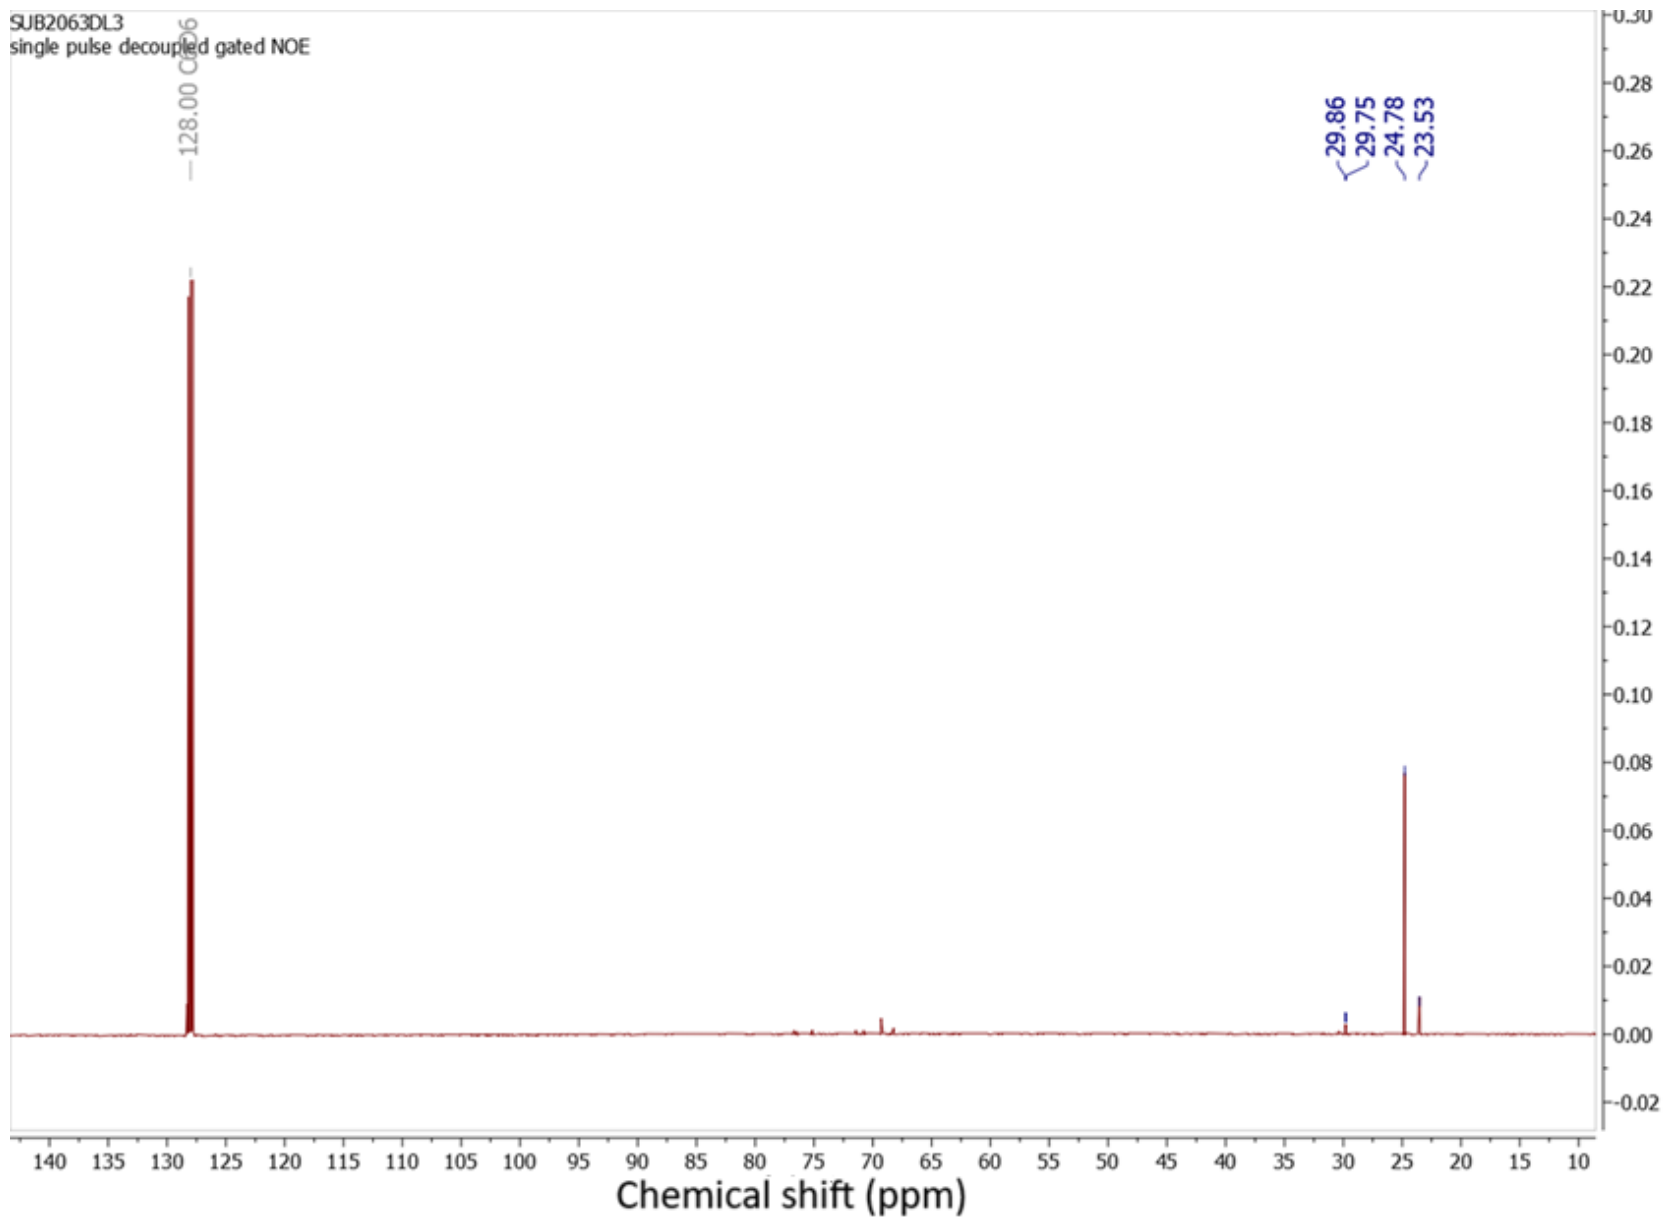

**Fig S2.**  $^{13}\text{C}$  NMR spectrum of soluble fraction from the polymerization of **1**.

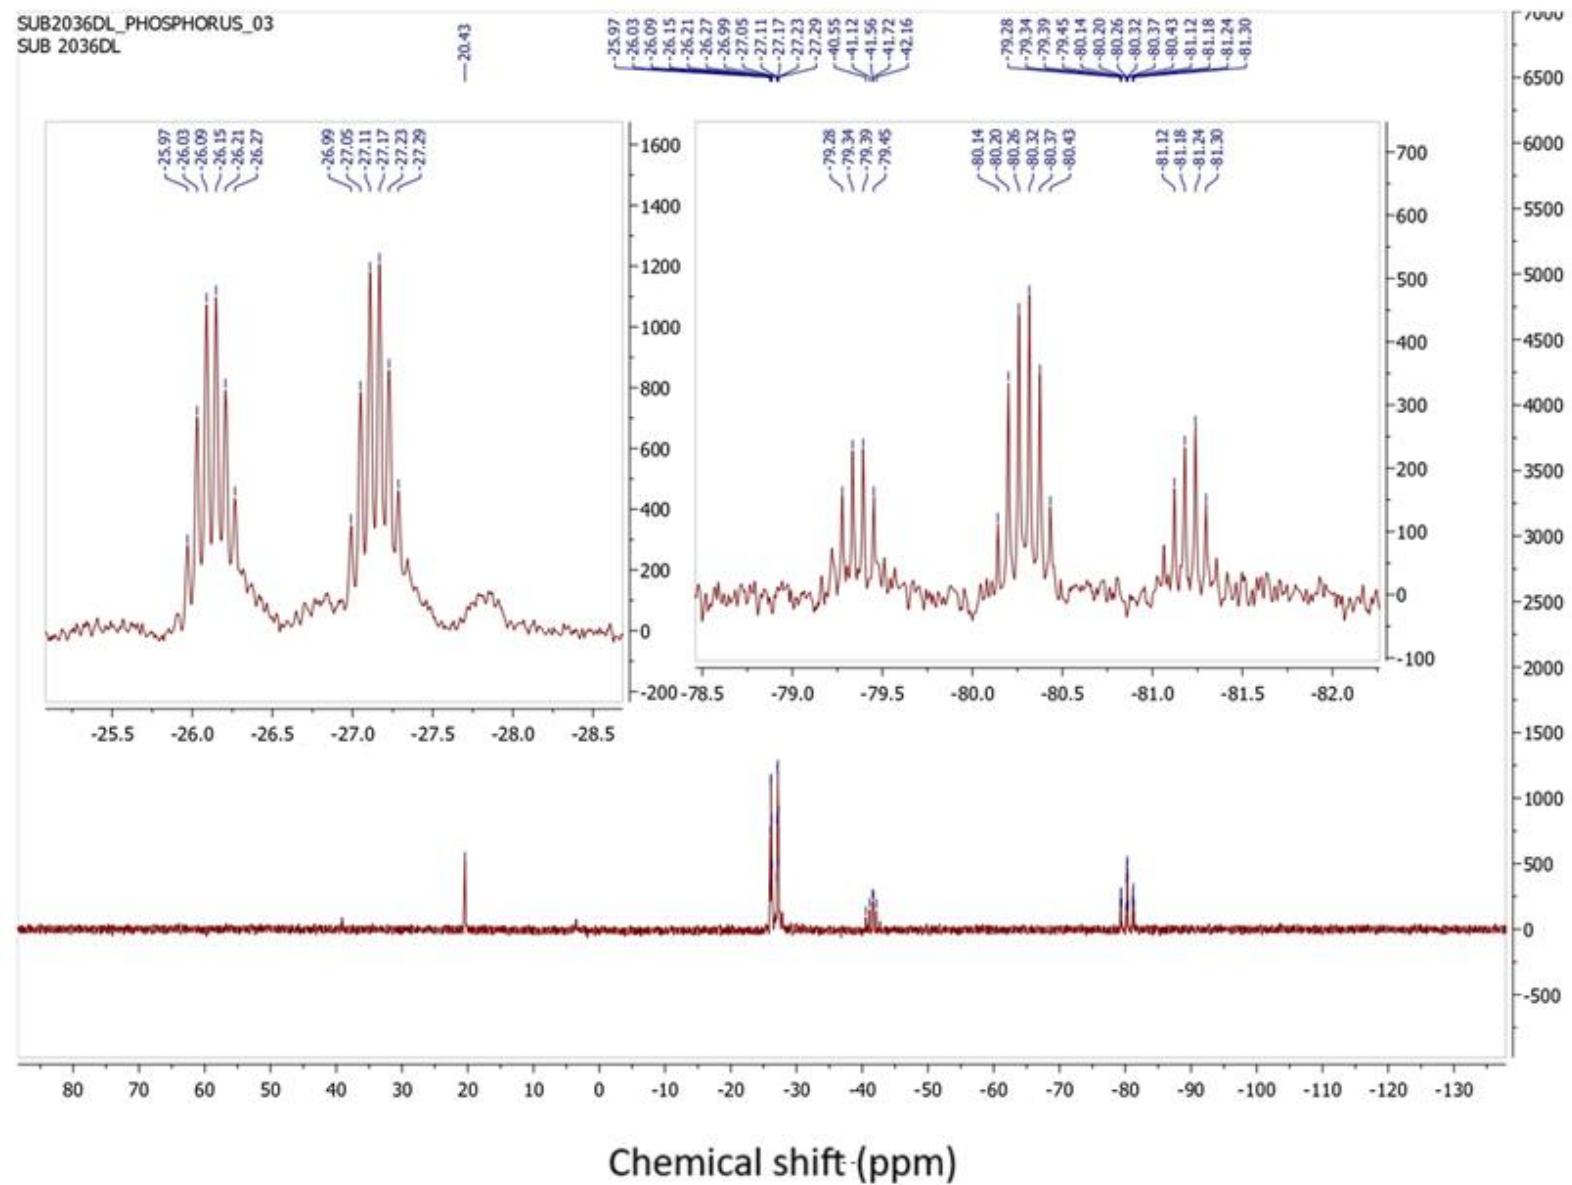

**Fig S3.**  $^{31}\text{P}$  NMR spectrum of soluble fraction from the polymerization of **1**.

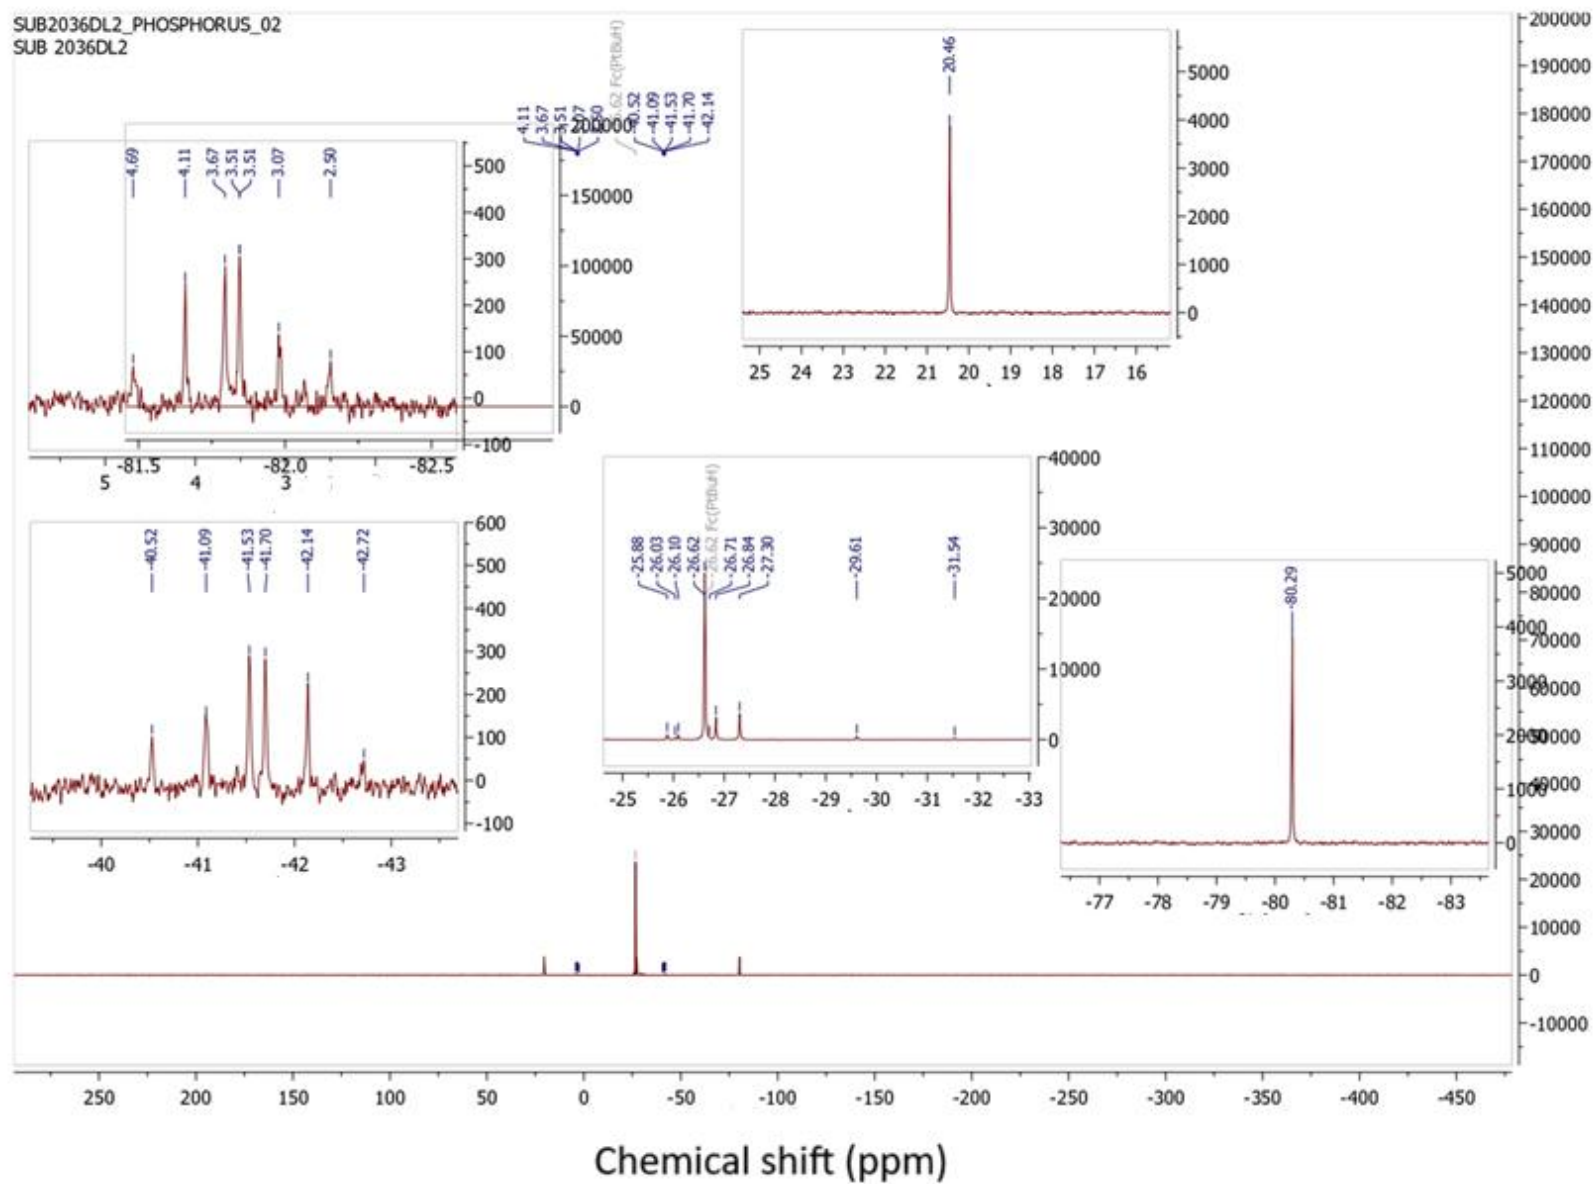

**Fig S4.**  $^{31}\text{P}$   $\{^1\text{H}\}$  NMR spectrum of soluble fraction from the polymerization of **1**.

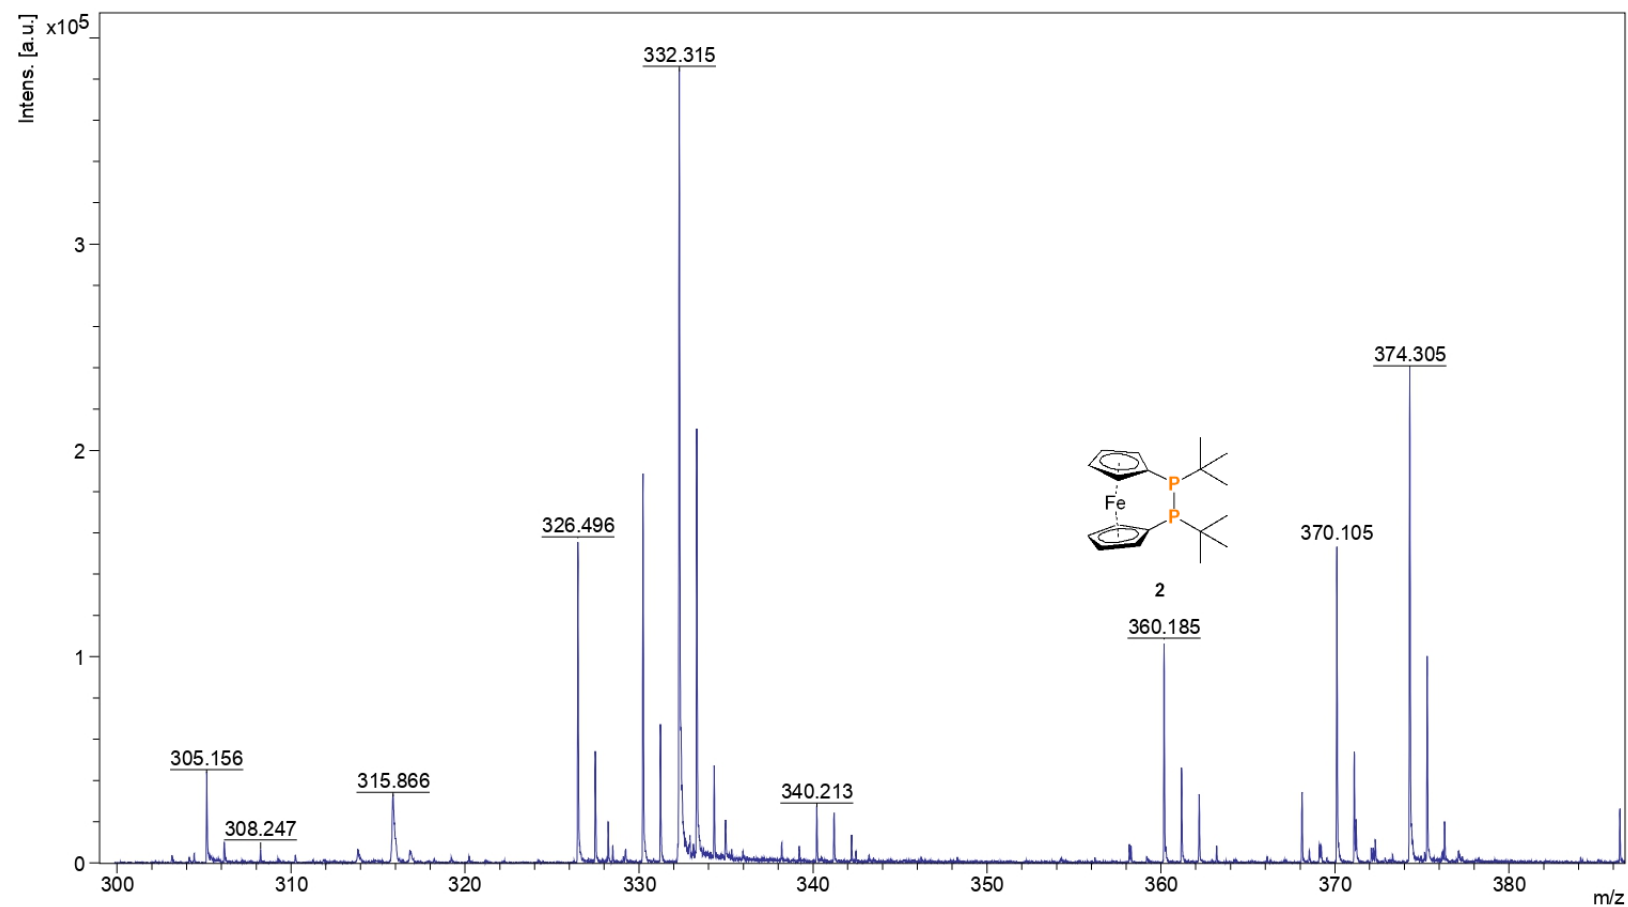

**Fig S5.** MALDI spectrometric analysis from soluble fraction from the polymerization of **1**, showing corresponding peaks for **2**.

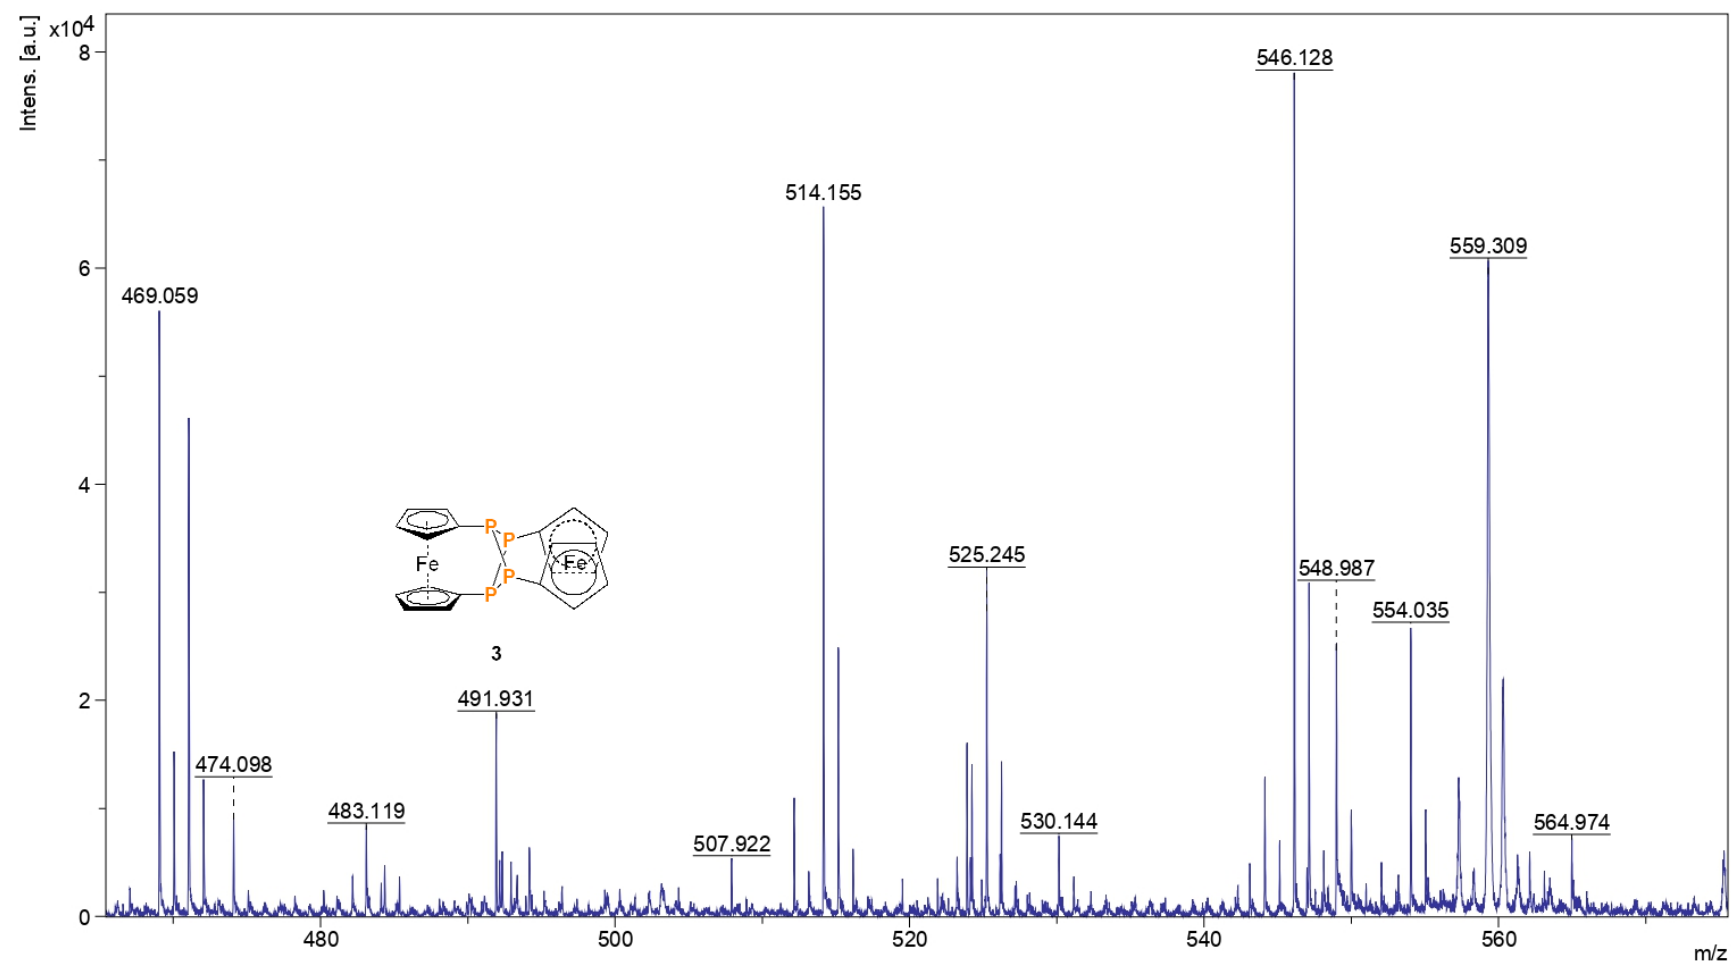

UltraFlextreme -- Bruker Daltonics flexAnalysis

printed: 10/6/2023 10:01:28 AM

**Fig S6.** MALDI spectrometric analysis from soluble fraction from the polymerization of **1**, showing corresponding peaks for **3**.

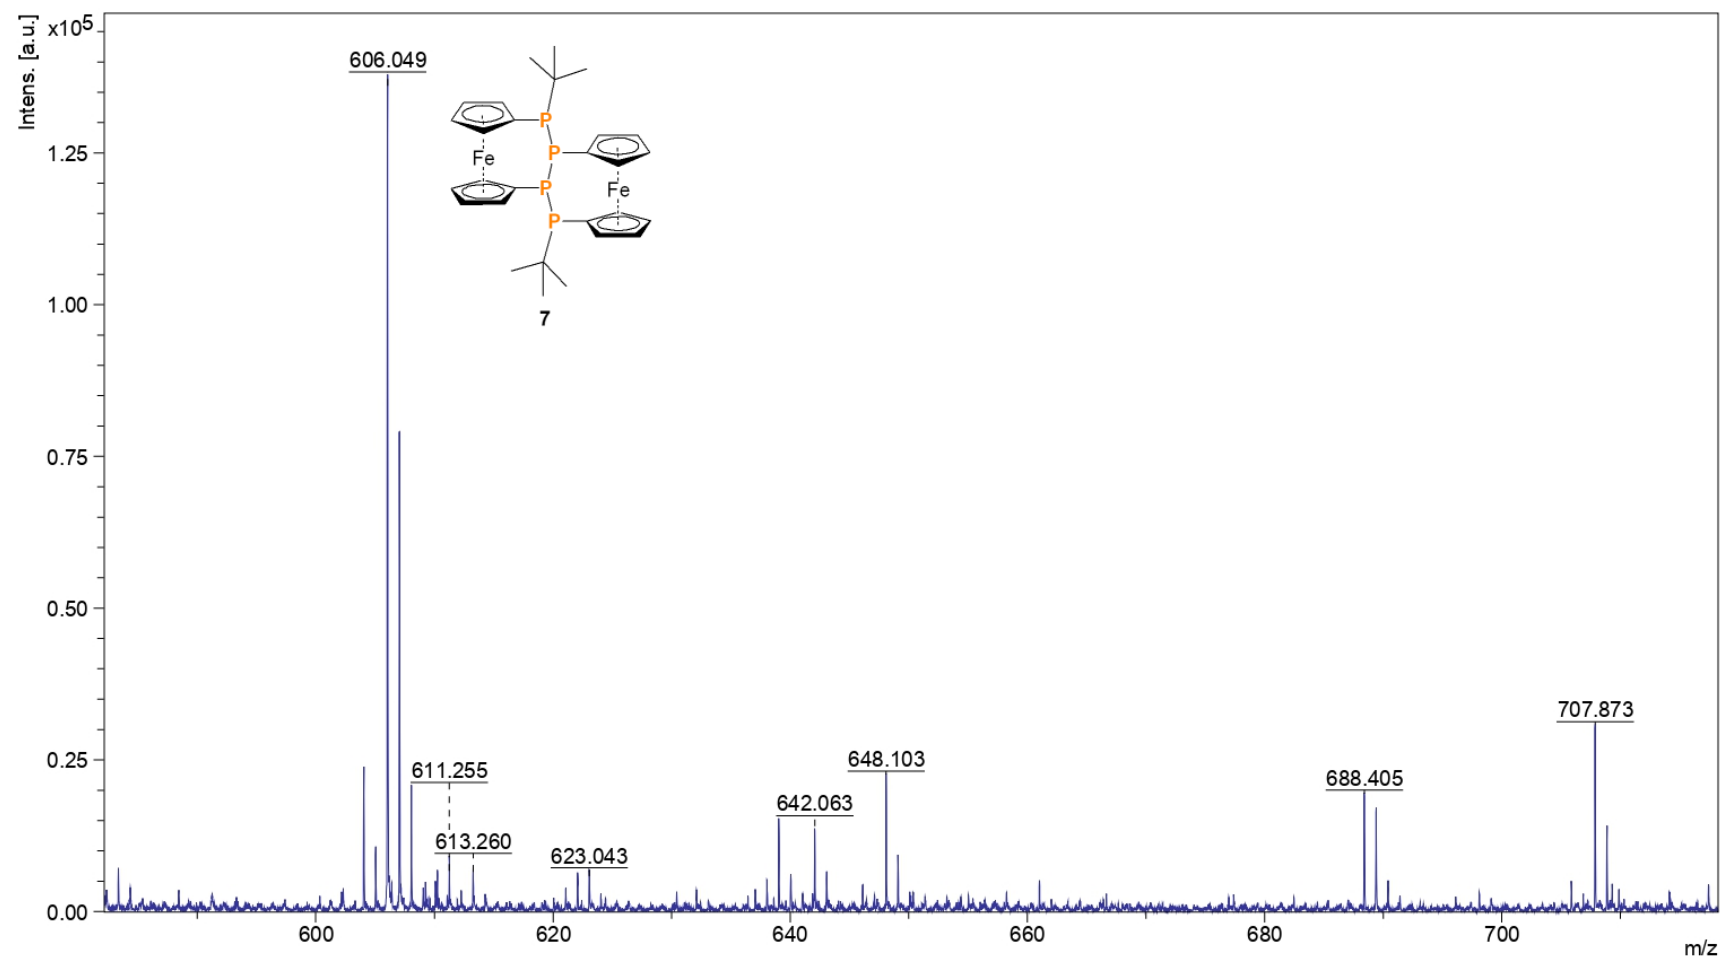

UltraFLEXtreme -- Bruker Daltonics flexAnalysis

printed: 10/6/2023 10:01:41 AM

**Fig S7.** MALDI spectrometric analysis from soluble fraction from the polymerization of **1**, showing corresponding peaks for **7**.

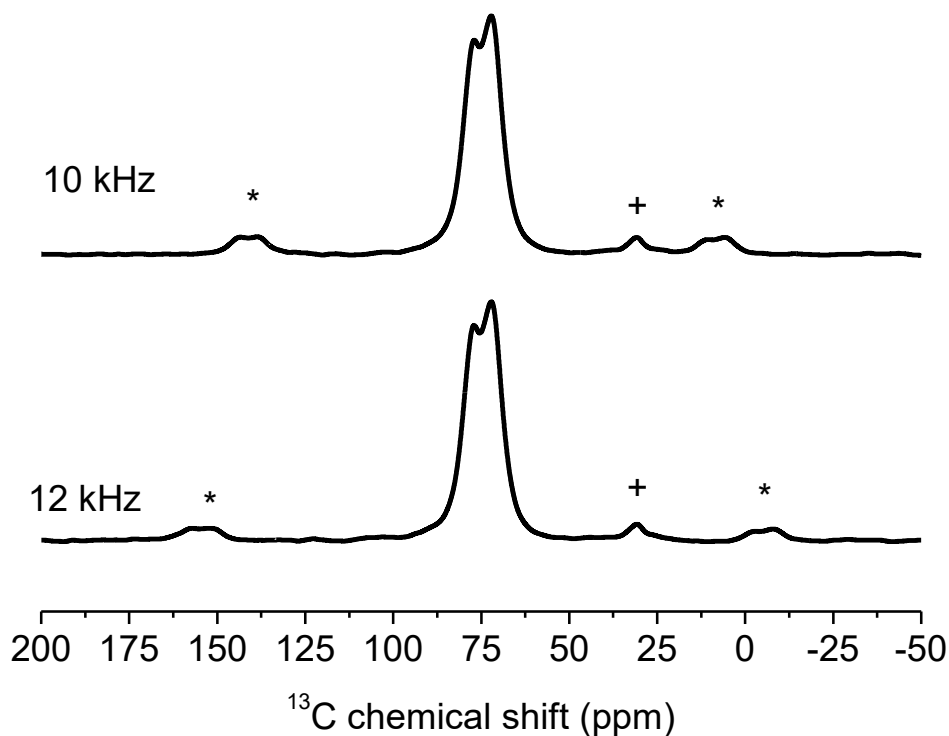

**Fig S8.** Comparable perspective of  $^{13}\text{C}$  CP MAS NMR spectra of polymer **5**, measured at 14 T at 10 and 12 kHz spinning, respectively.  
 Note: Spinning sidebands are marked with asterisks and plus.

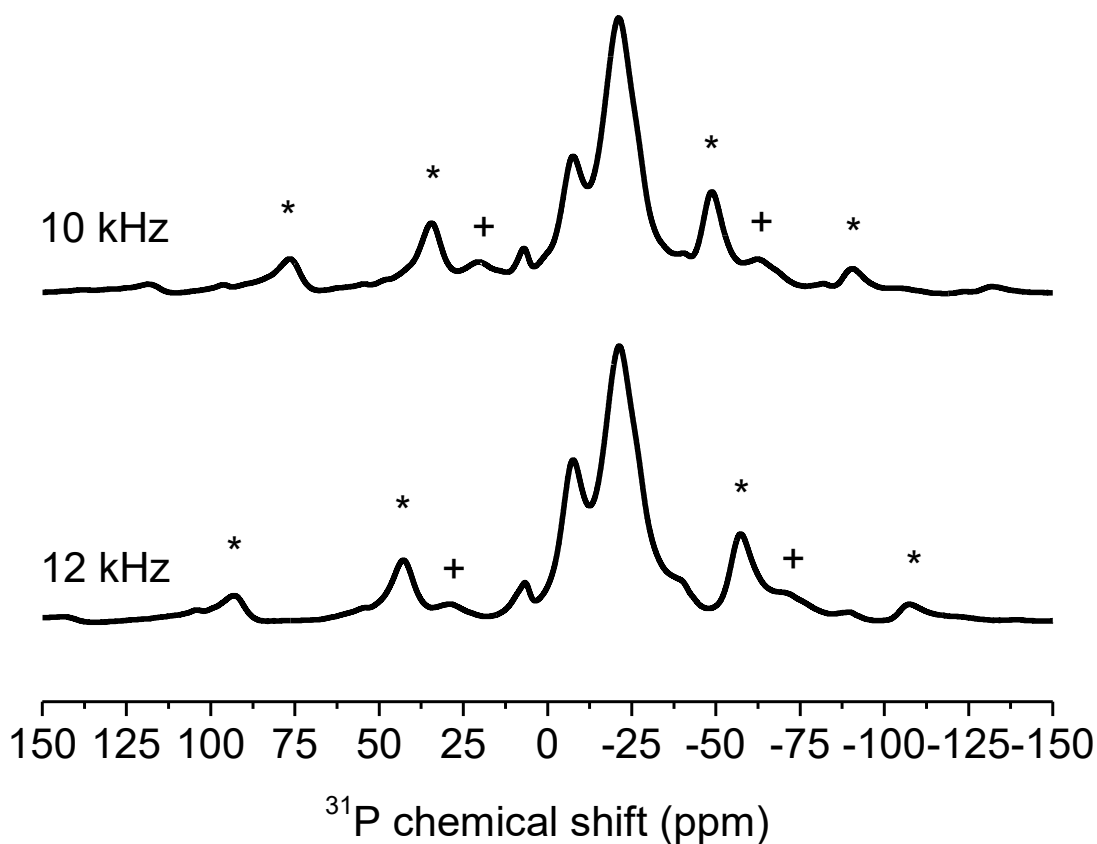

**Fig S9.** Comparable perspective of  $^{31}\text{P}$  CP MAS NMR spectra of polymer **5**, measured at 14 T at 10 and 12 kHz spinning, respectively.  
 Note: Spinning sidebands are marked with asterisks, plus, minus and tilde.

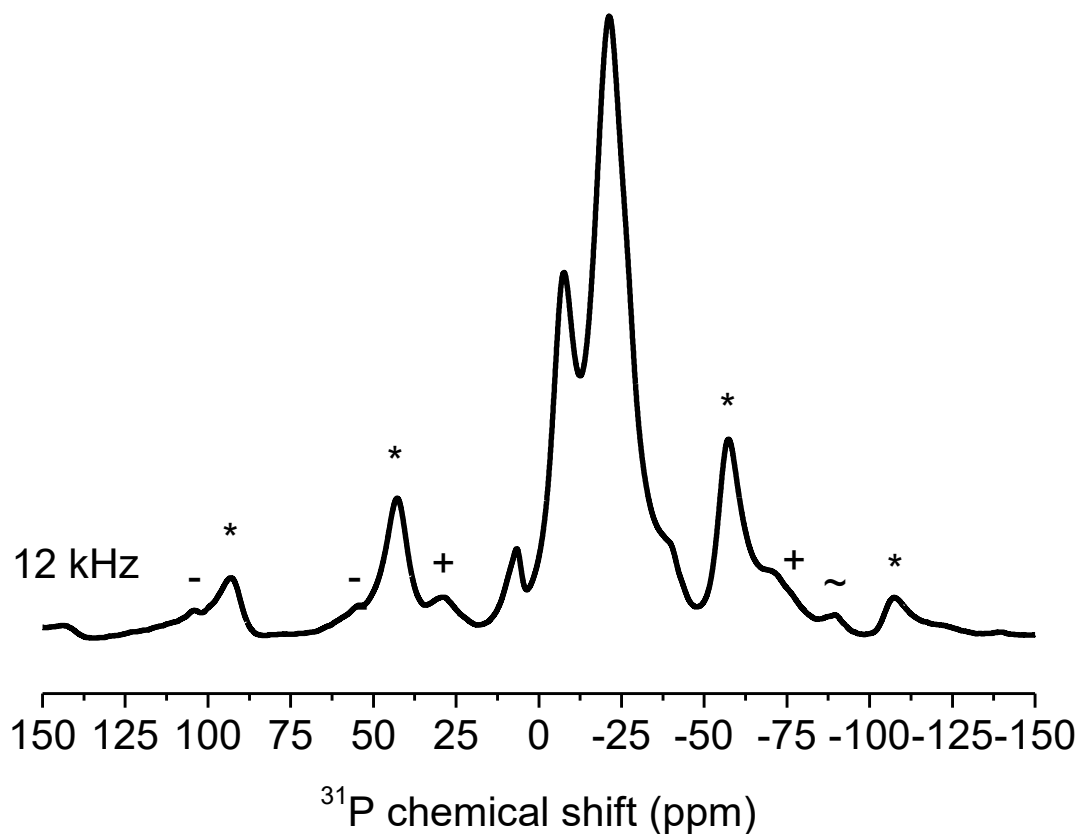

**Fig S10.**  $^{31}\text{P}$  CP MAS NMR spectra of polymer **5**, measured 14 T at 12 kHz spinning. Note: Spinning sidebands are marked with asterisks, plus, minus and tilde.

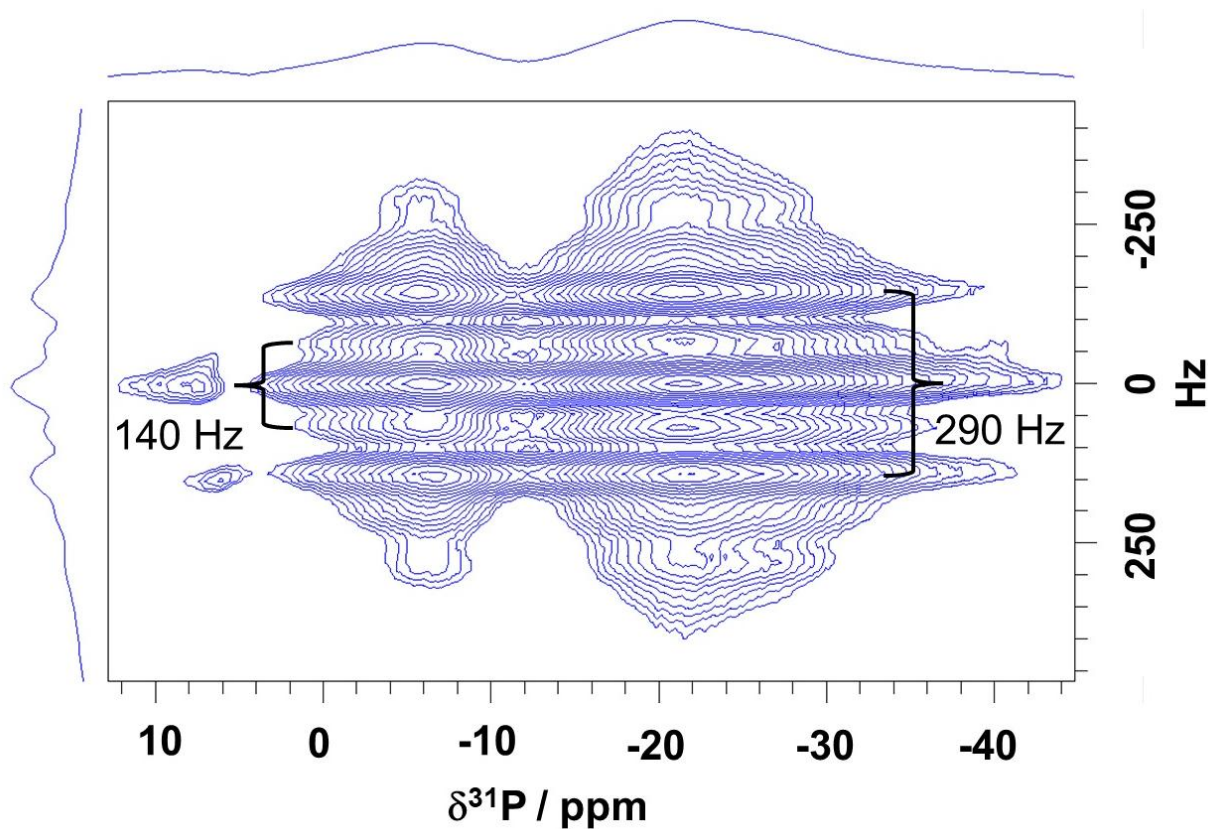

**Fig S11.**  $^{31}\text{P}$   $J$ -resolved NMR spectrum of polymer **5**, measured at 12 kHz spinning.

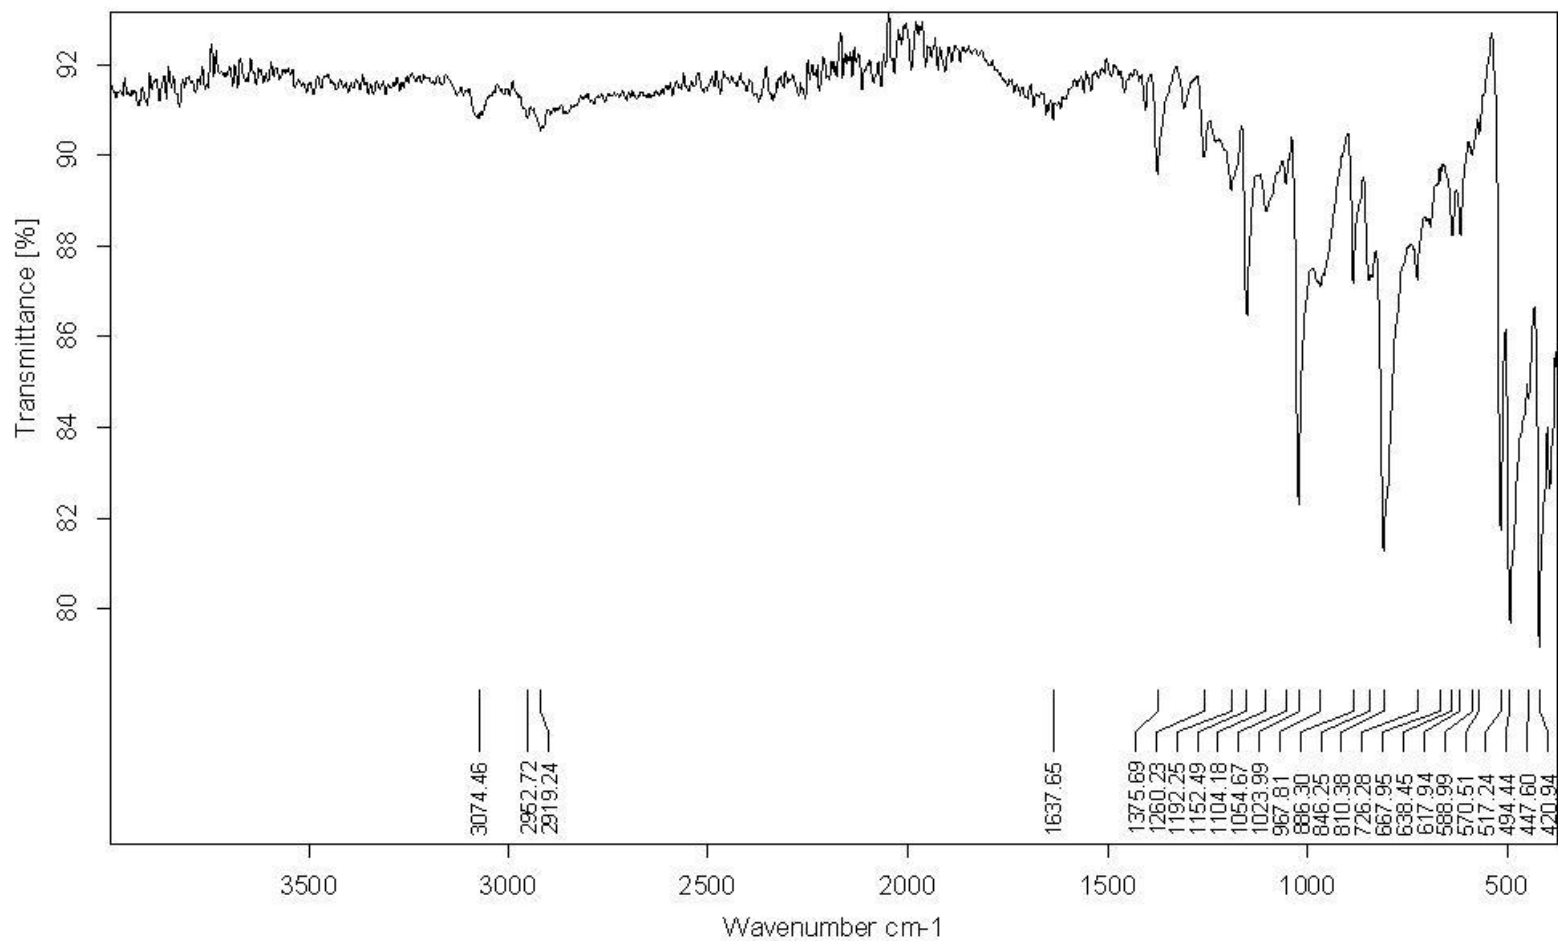

|                                                                                 |        |                                    |            |
|---------------------------------------------------------------------------------|--------|------------------------------------|------------|
| C:\Programme\OPUS_65\MEAS\SUB560.0                                              | SUB560 | Instrument type and / or accessory | 27/01/2023 |
| C:\Dokumente und Einstellungen\Admin\Desktop\IR\AG Pietschnig\Subhayan\SUB560.0 | SUB560 | Instrument type and / or accessory | 27/01/2023 |

Seite 1 von 1

**Fig S12.** Solid state ATR-IR spectrum of polymer **5**.

The full characterization of **5** is reported in article reported by Pietschnig *et. al.*<sup>[1]</sup>

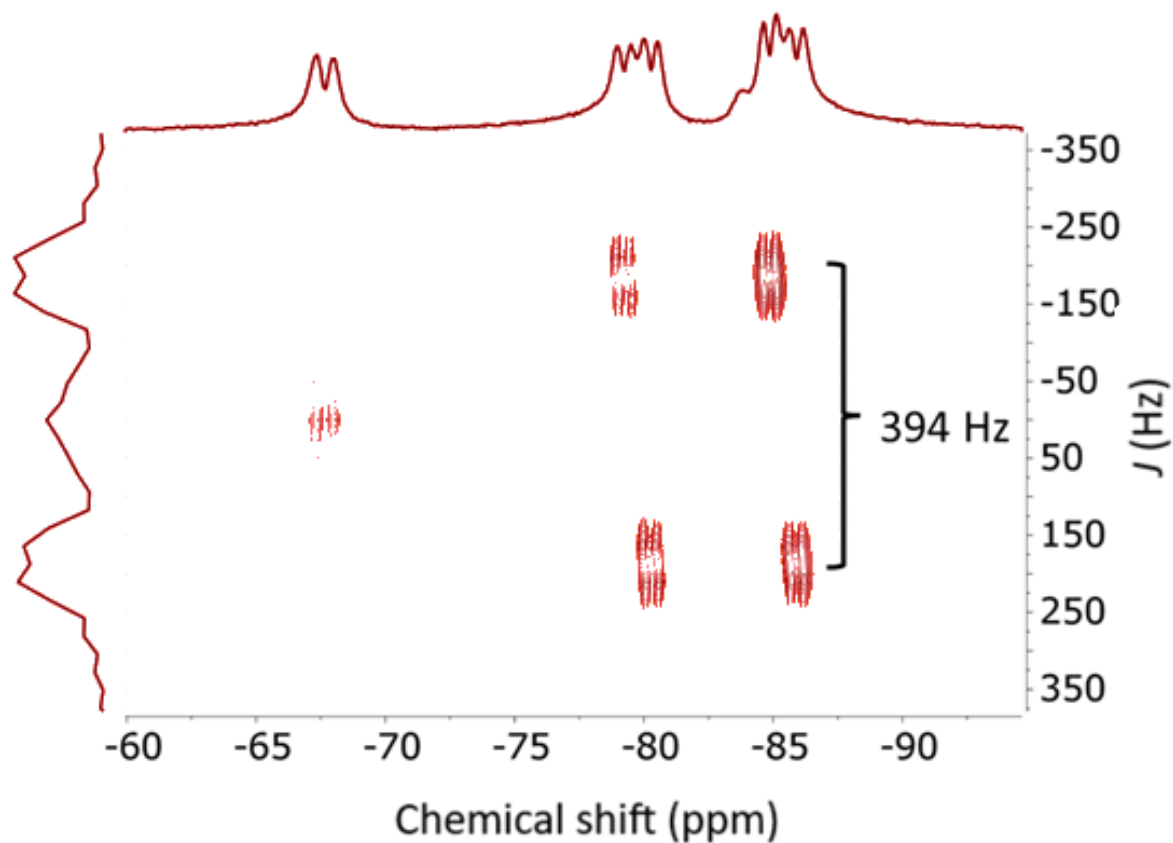

**Fig S13.**  $^{31}\text{P}$   $J$ -resolved NMR spectrum of Wilkinson's-Catalyst, measured at 12 kHz spinning.  
 Note:  $^2J(^{31}\text{P}\text{-}^{31}\text{P})_{\text{trans}} = 394$  Hz

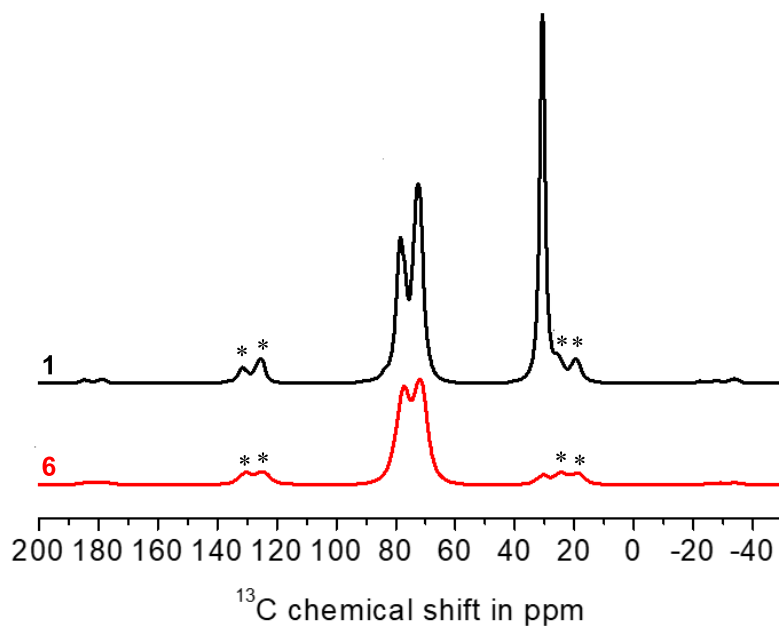

**Fig S14.**  $^{13}\text{C}$  CP MAS NMR spectra of **1** (in black) and polymer **6** (in red), measured at 8 kHz spinning.  
 Note: Spinning sidebands are marked with asterisks.

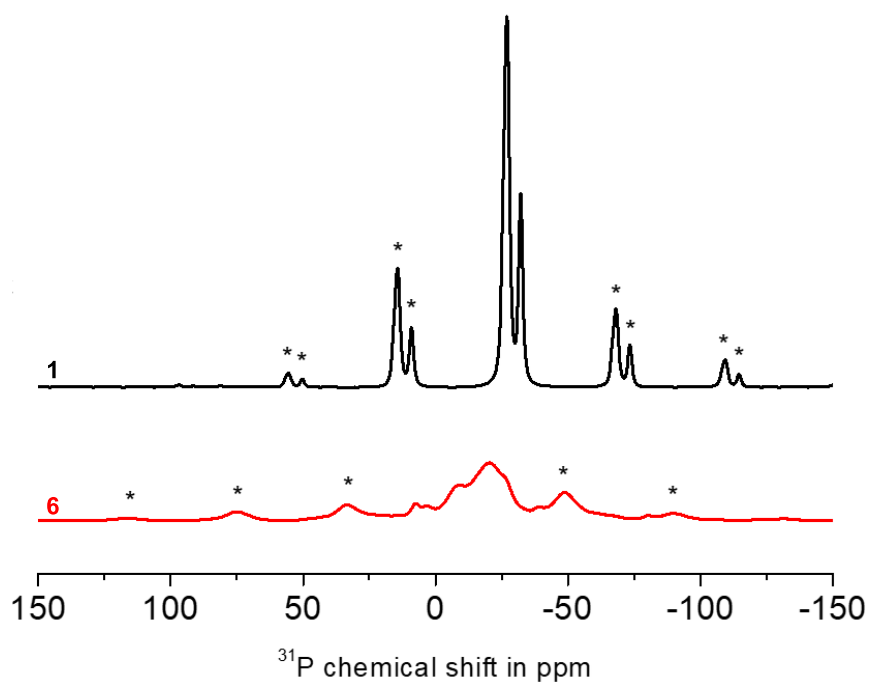

**Fig S15.**  $^{31}\text{P}$  CP MAS NMR spectra of **1** (in black) and polymer **6** (in red), measured at 10 kHz spinning.  
 Note: Spinning sidebands are marked with asterisks.

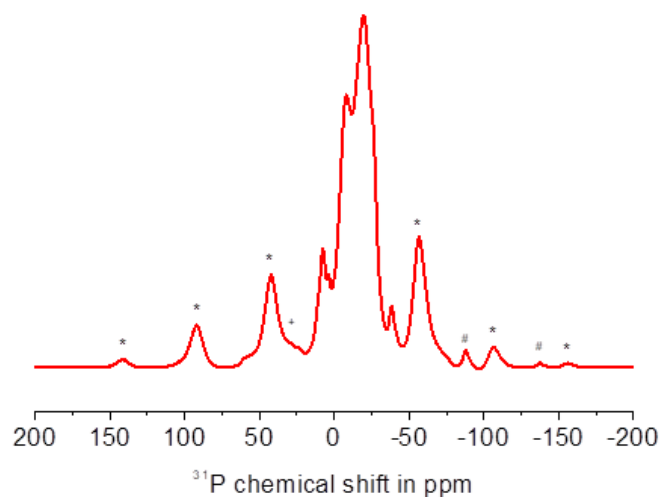

**Fig S16.**  $^{31}\text{P}$  CP MAS NMR spectrum of polymer **6**, measured at 12 kHz spinning.  
 Note: Spinning sidebands of the broad signals at -8, -20, -26 and -38 ppm are marked with asterisks, plus and hashtags, respectively.

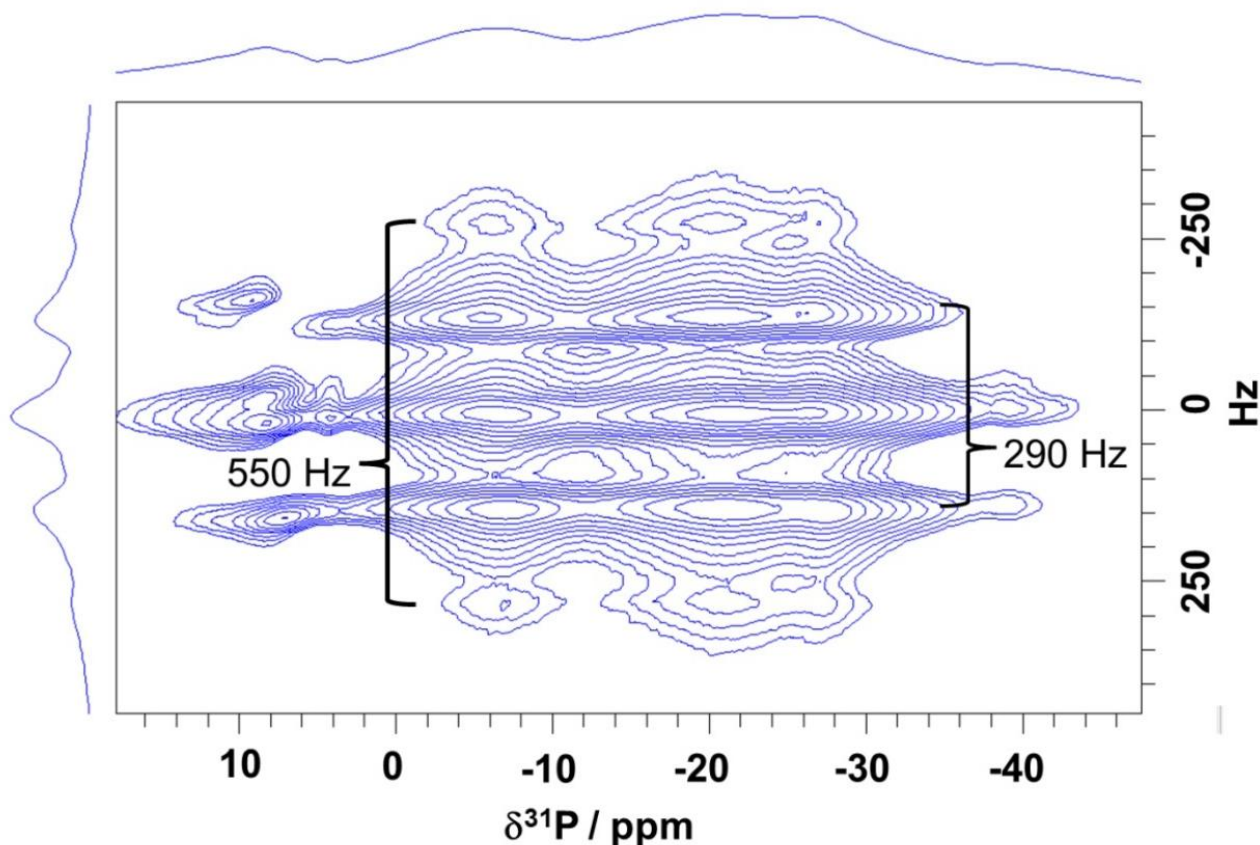

**Fig S17.**  $^{31}\text{P}$   $J$ -resolved NMR spectrum of polymer **6**, measured at 12 kHz spinning.

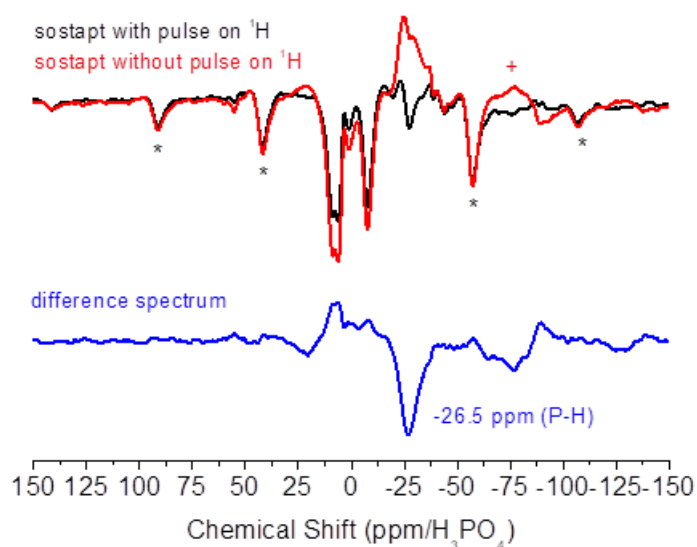

**Fig S18.**  $^{31}\text{P}$  sostapt spectra of polymer **6**, measured at 12 kHz spinning.

Note: The black spectrum was recorded applying pulse power on  $^1\text{H}$  during inversion of  $^{31}\text{P}$  with a  $180^\circ$  pulse. The red spectrum was recorded applying no pulse power on  $^1\text{H}$  during inversion of  $^{31}\text{P}$  with a  $180^\circ$  pulse. This switches all  $^{31}\text{P}$  nuclei except those coupled directly to  $^1\text{H}$ . The blue spectrum shows the difference spectrum indicating the  $^{31}\text{P}$  signals of phosphorus directly coupled to  $^1\text{H}$  as signals with negative amplitude.

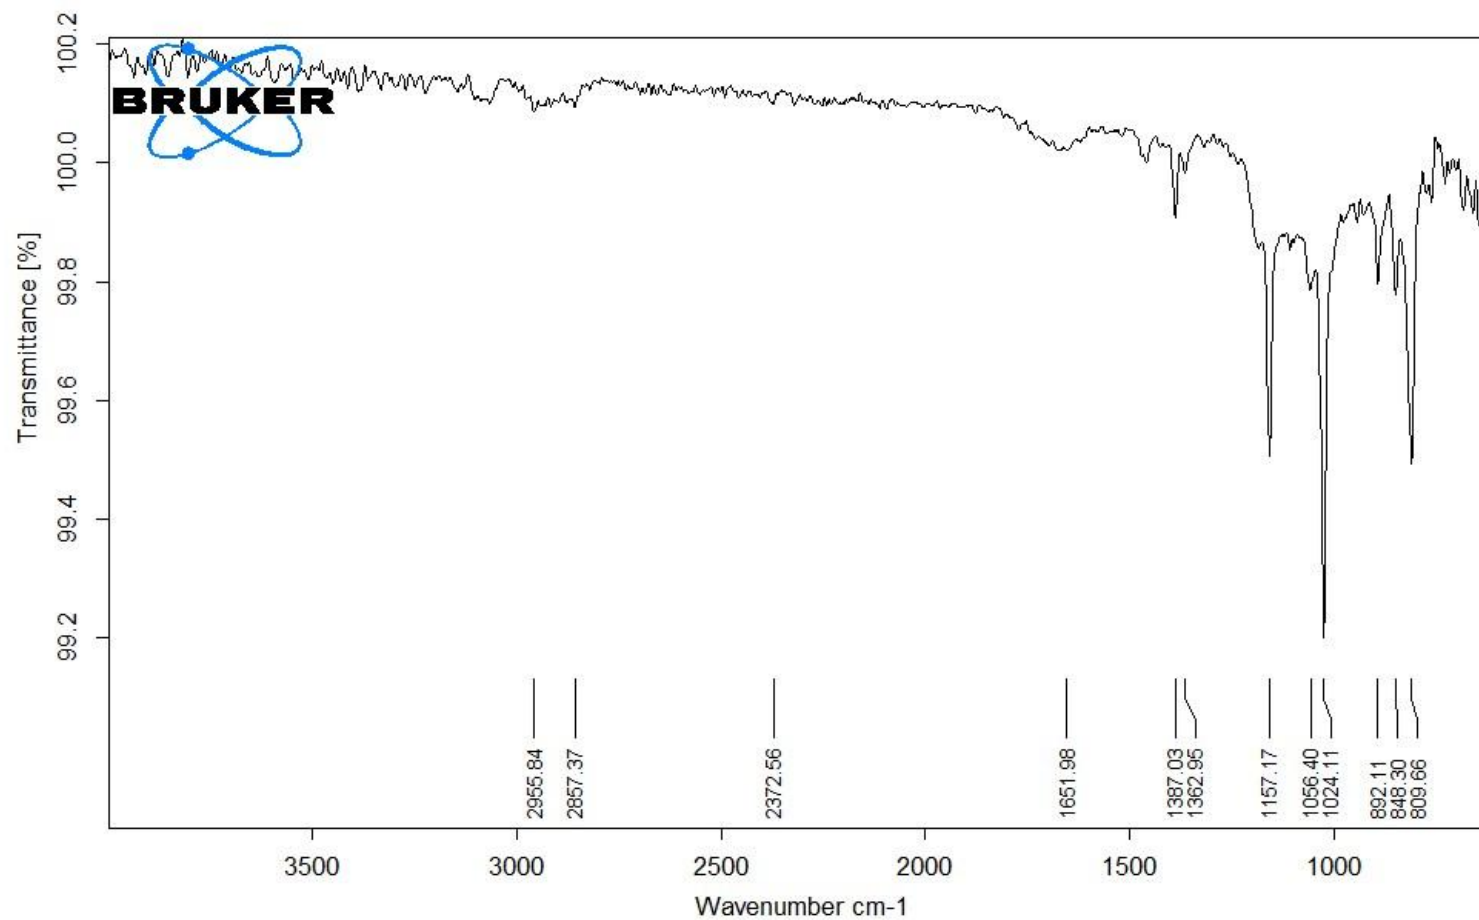

|                                      |       |                                    |            |
|--------------------------------------|-------|------------------------------------|------------|
| D:\Data\IR_Spektren\HYM\SUBY\SD497.0 | SD497 | Instrument type and / or accessory | 27.09.2023 |
|--------------------------------------|-------|------------------------------------|------------|

Seite 1 von 1

**Fig S19.** Solid state ATR-IR spectrum of polymer **6**.

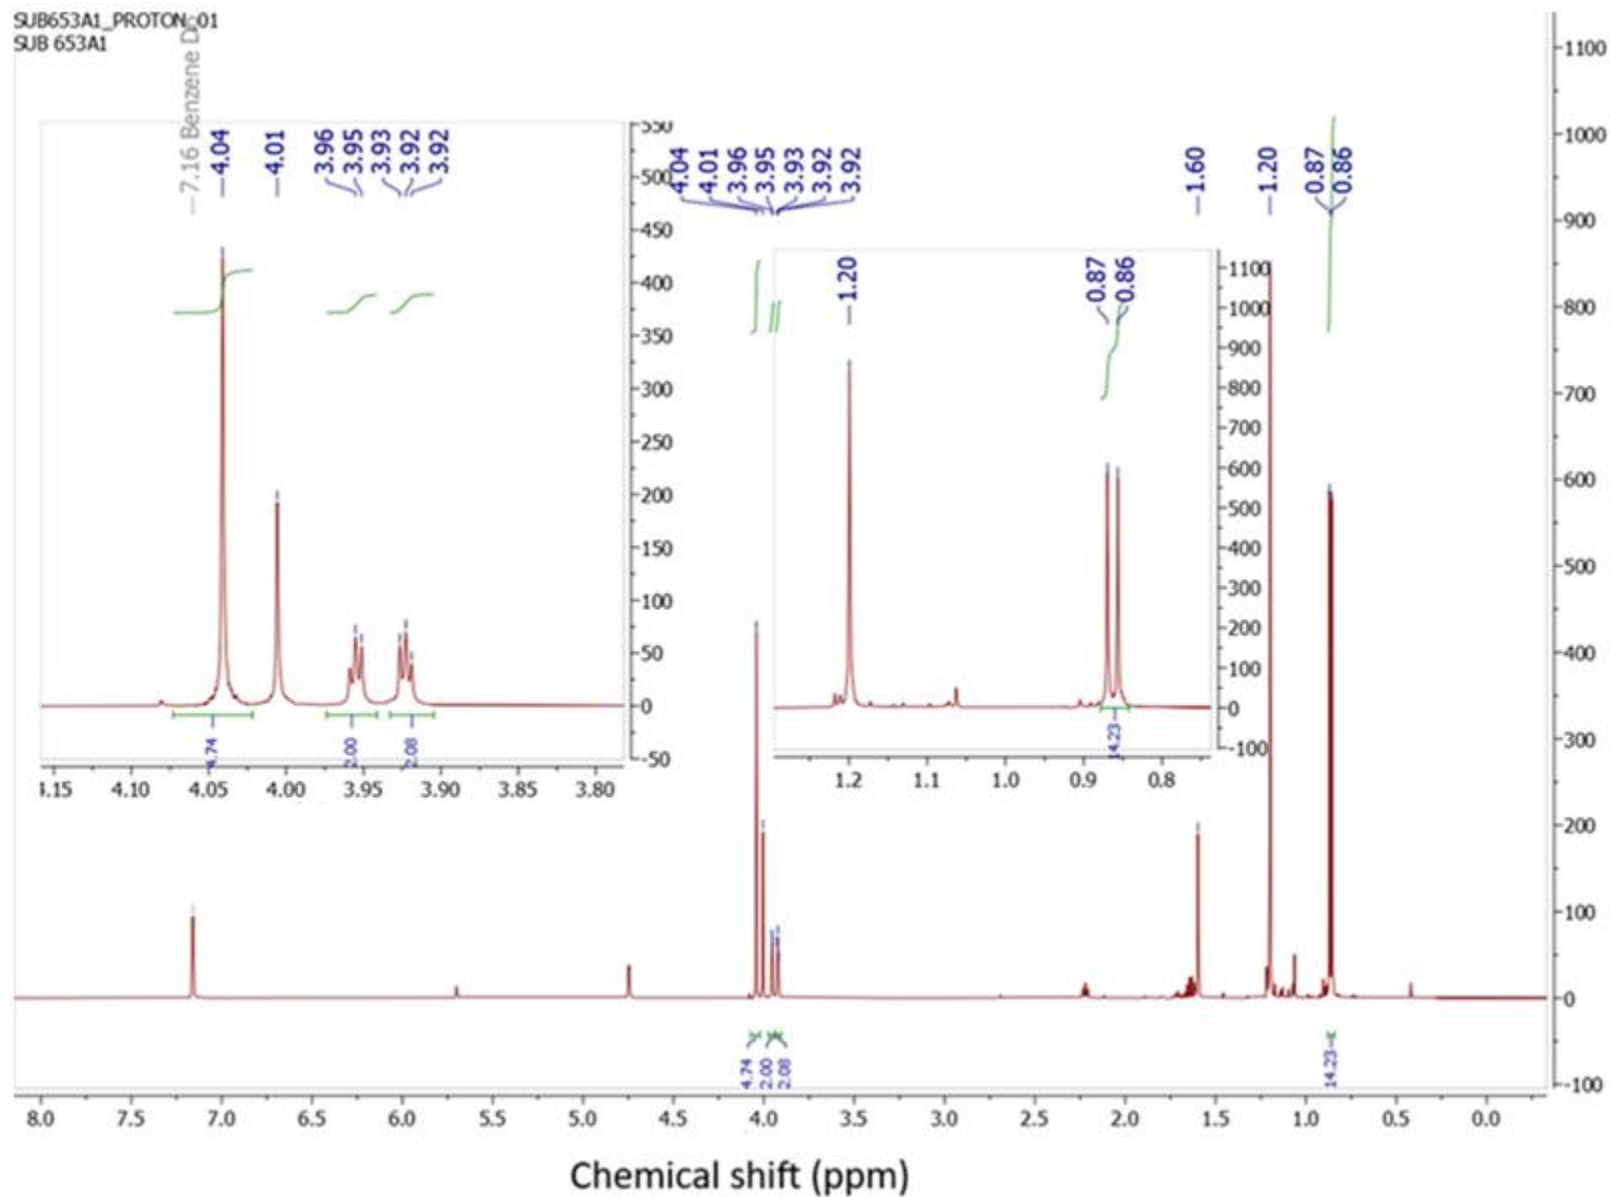

**Fig S20.**  $^1\text{H}$  spectroscopic analysis from the crude of polymerization reaction of  $\text{Fc}'(\text{P}^t\text{Bu}_2)_2$ .  
NOTE: Signals at  $\delta$  0.87, 3.92, 3.96 and 4.04 are resulting from  $\text{Fc}'\text{Bu}$  (**8**), whereas signal at  $\delta$  1.20 is resulting from  $^t\text{Bu}-^t\text{Bu}$ .

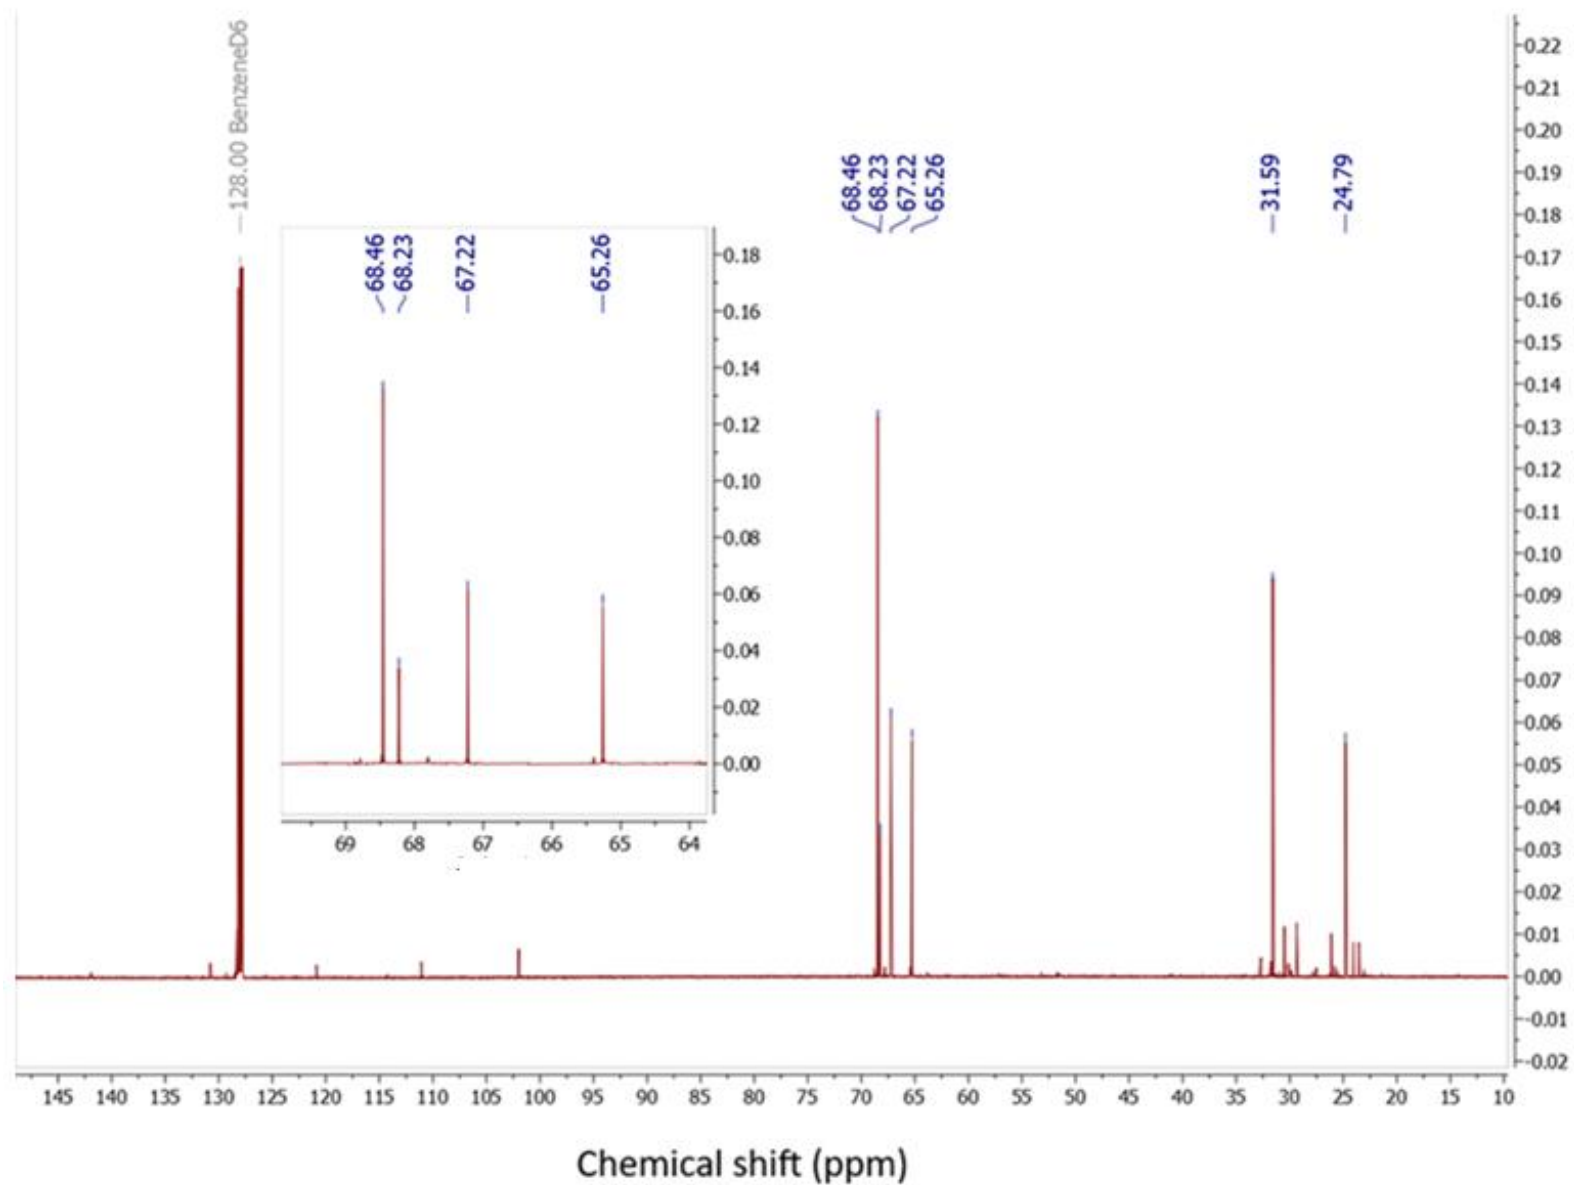

**Fig S21.**  $^{13}\text{C}$  spectroscopic analysis from the crude of polymerization reaction of  $\text{Fc}'(\text{P}^t\text{Bu}_2)_2$ .

SUB653B1\_PHOSPHORUS\_01  
SUB 653B1

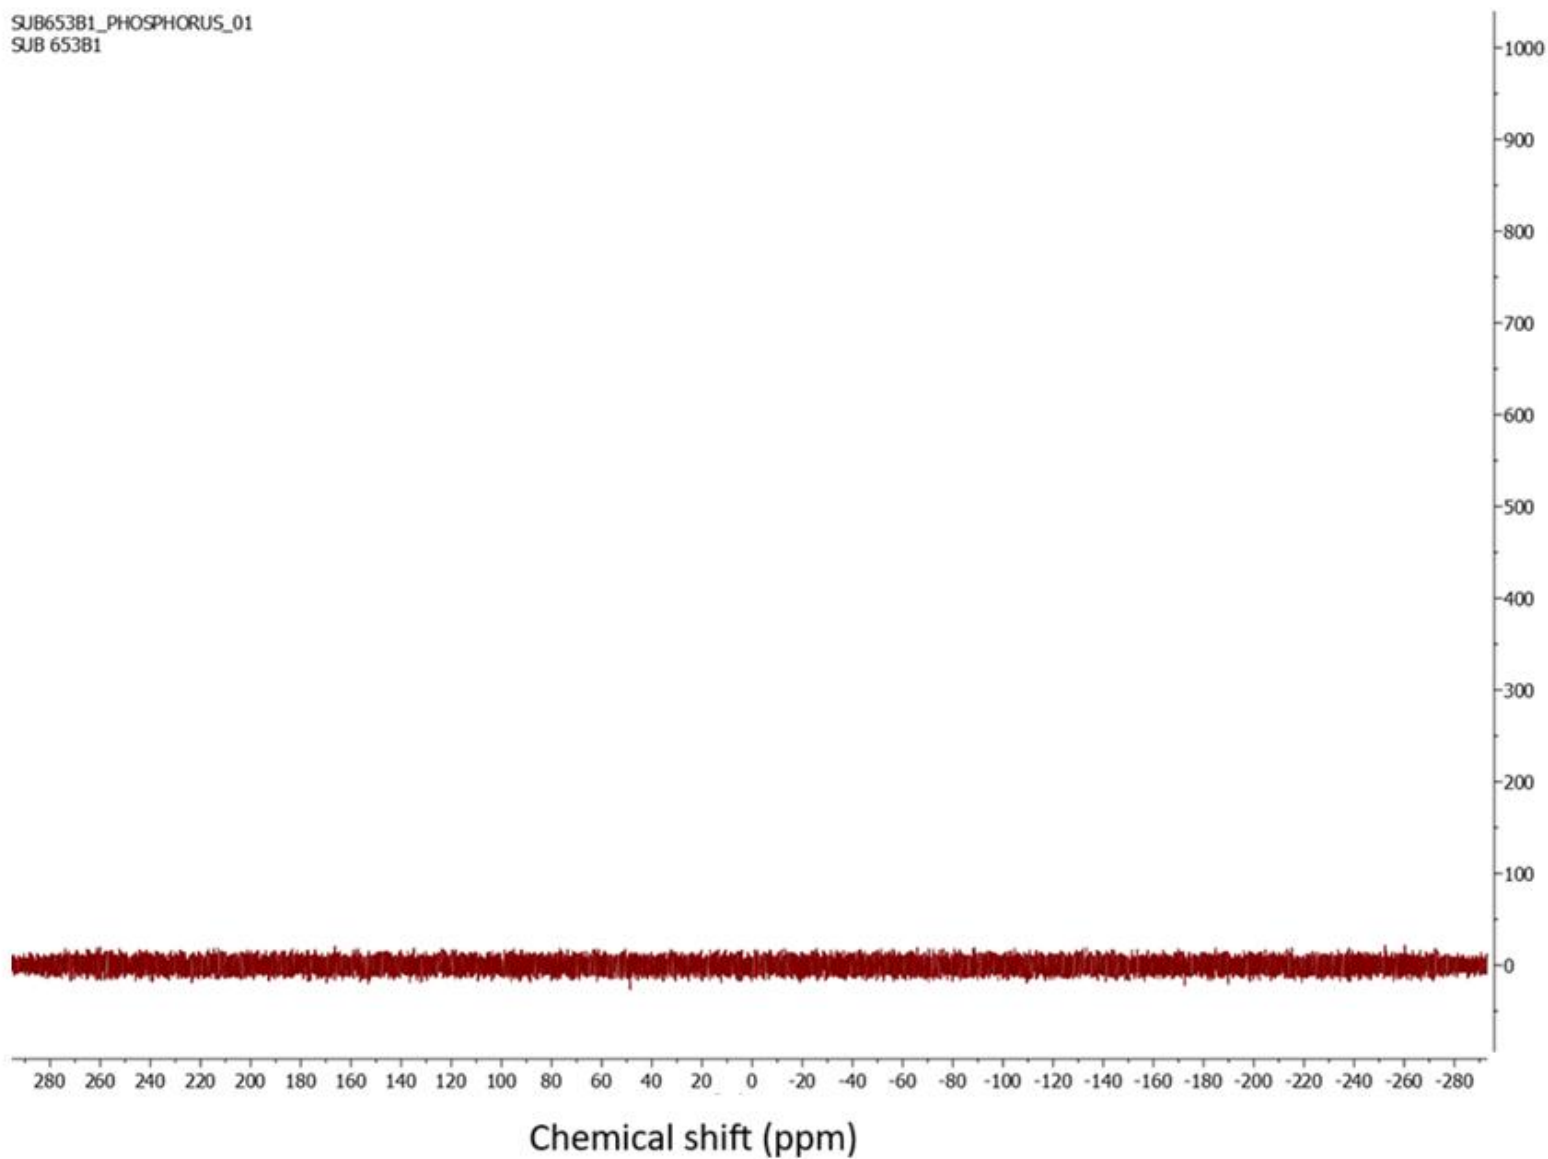

**Fig S22.**  $^{31}\text{P}\{^1\text{H}\}$  spectroscopic analysis from the crude of polymerization reaction of  $\text{Fc}'(\text{P}^t\text{Bu}_2)_2$ .  
NOTE: The empty baseline signifies the absence of any soluble P-containing species in the reaction mixture.

SUB-653B #6 RT: 0.05 AV: 1 NL: 5.31E7  
T: FTMS + p ESI Full ms [150.00-2000.00]

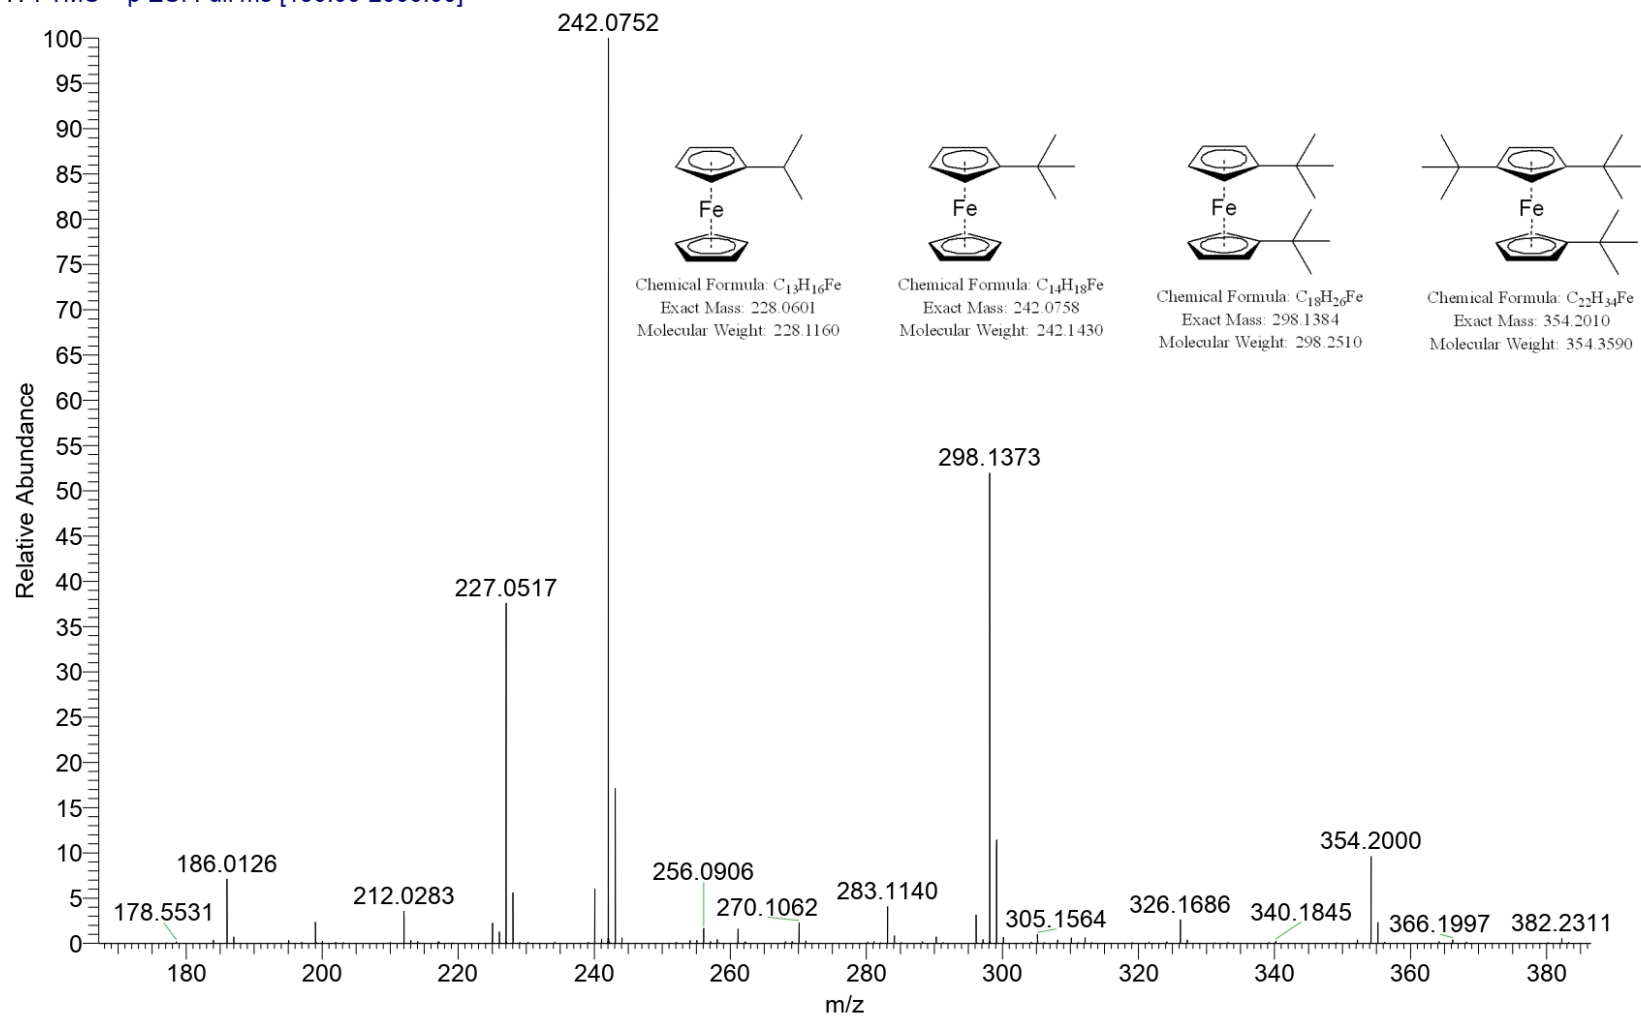

**Fig S23.** MALDI spectrometric analysis from soluble fraction from polymerization reaction of  $Fc'(PtBu_2)_2$ .

SUB-653B #6 RT: 0.05 AV: 1 NL: 5.31E7  
T: FTMS + p ESI Full ms [150.00-2000.00]

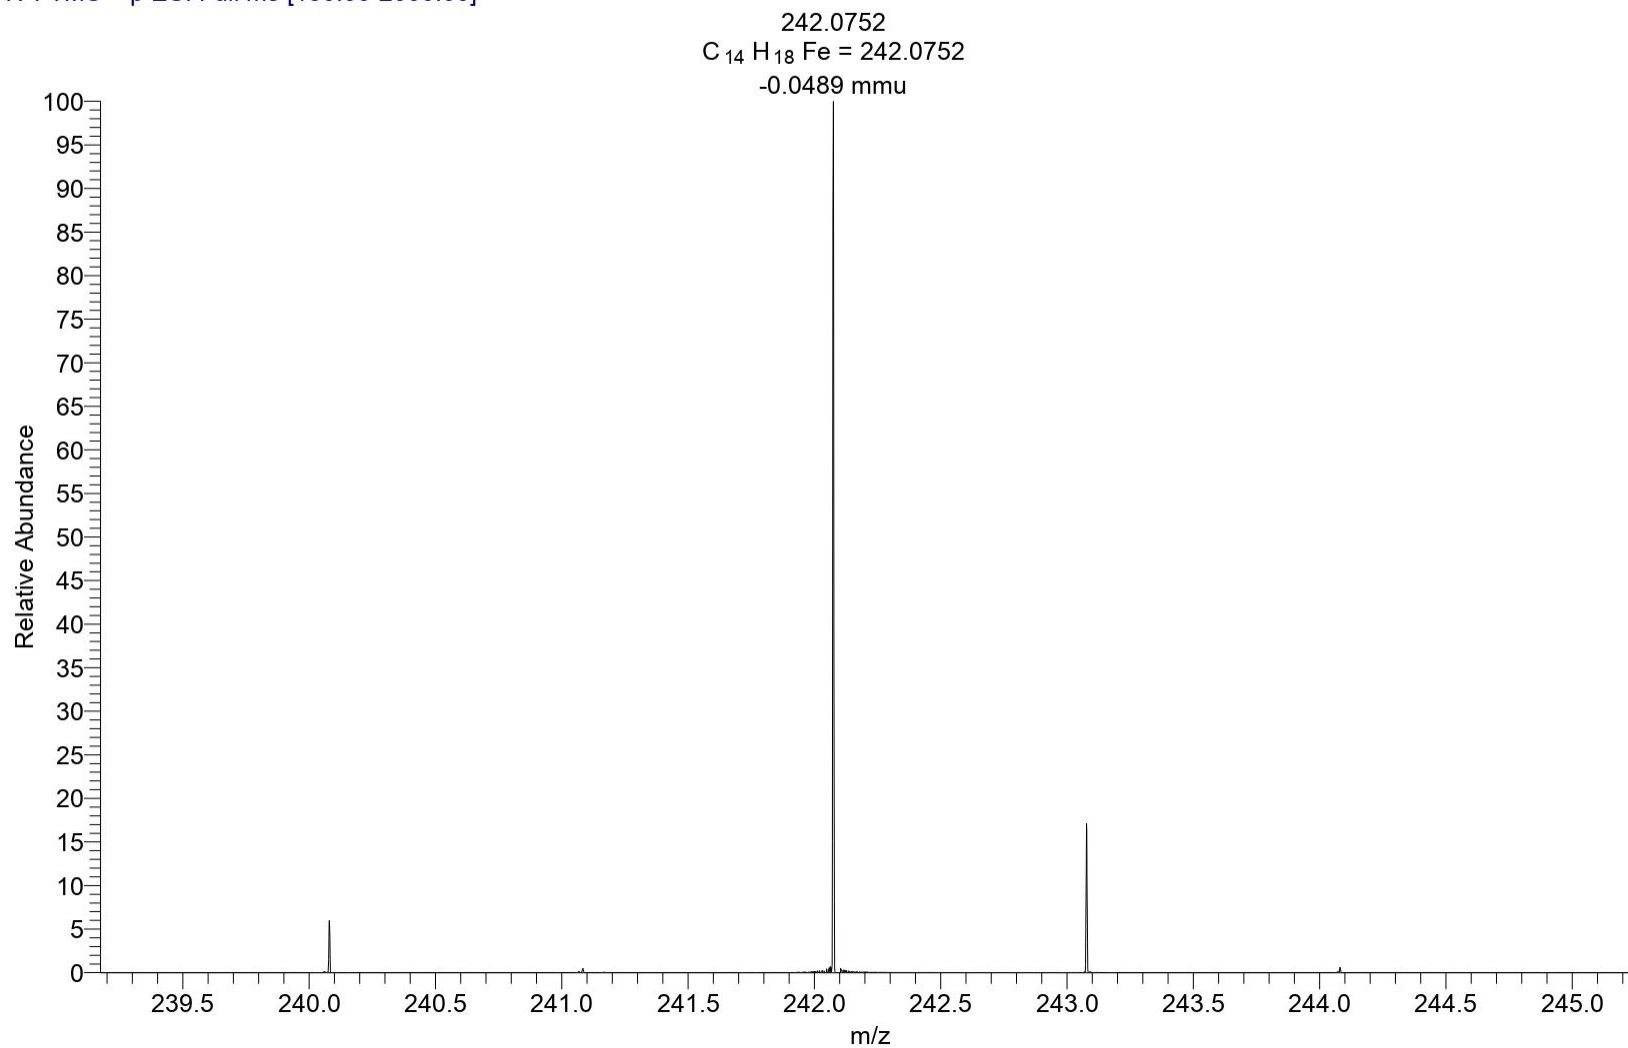

**Fig S24.** MALDI (HRMS) spectrometric analysis for Fc(<sup>t</sup>Bu)

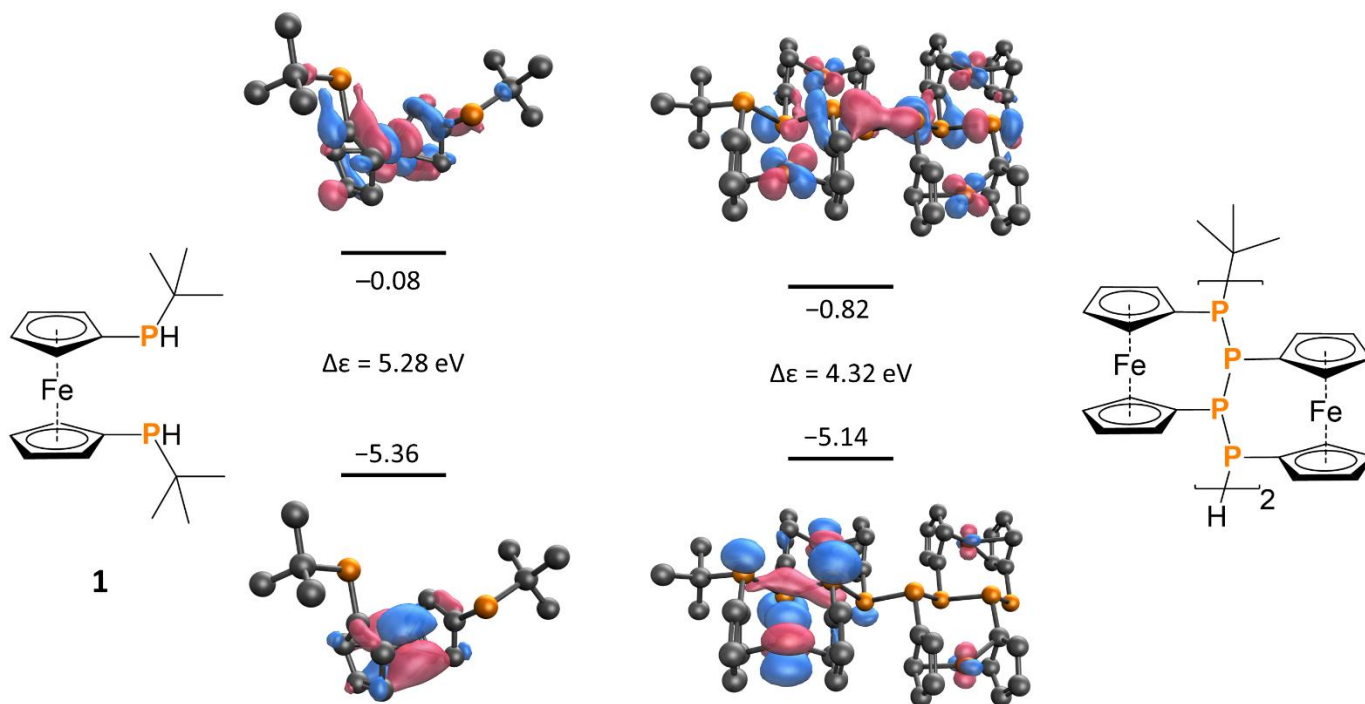

**Fig S25.** Kohn–Sham frontier molecular orbitals and corresponding energy levels (in eV) for compound **1** and the oligomeric model system (computed at B3LYP/6-31G\*\*// $\omega$ B97X-D/6-311+G\*\* level of theory)

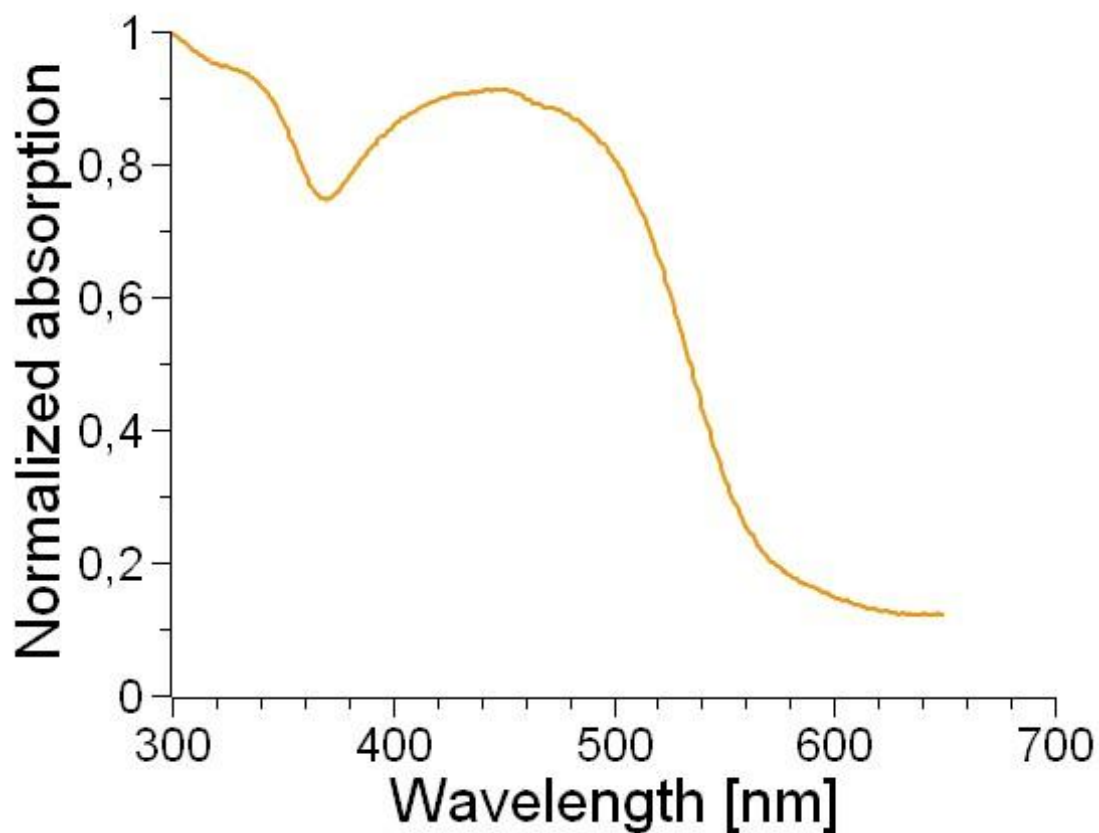

**Fig S26.** Solid state UV-Vis spectra of compound **1**.

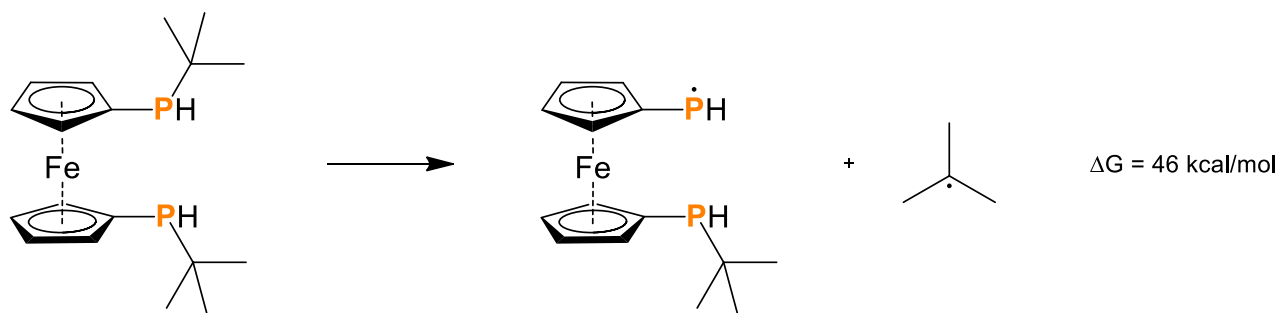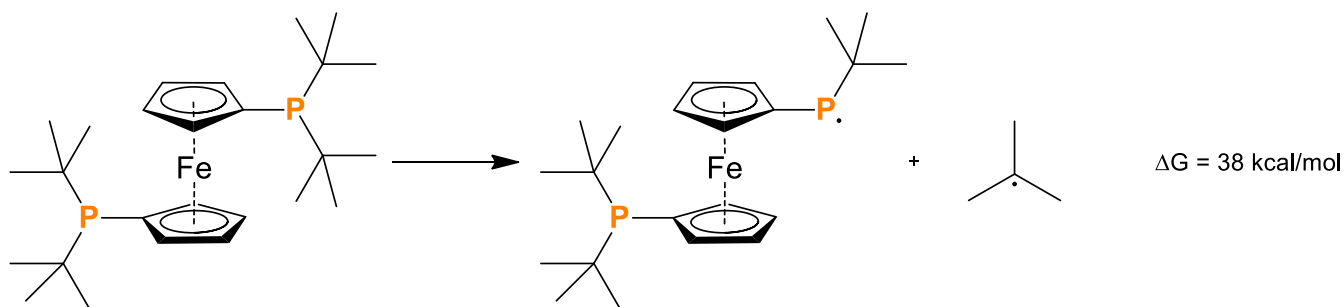

**Scheme S1.** The cleavage of the P–C(tBu) bond in cases of **1** and **8**.

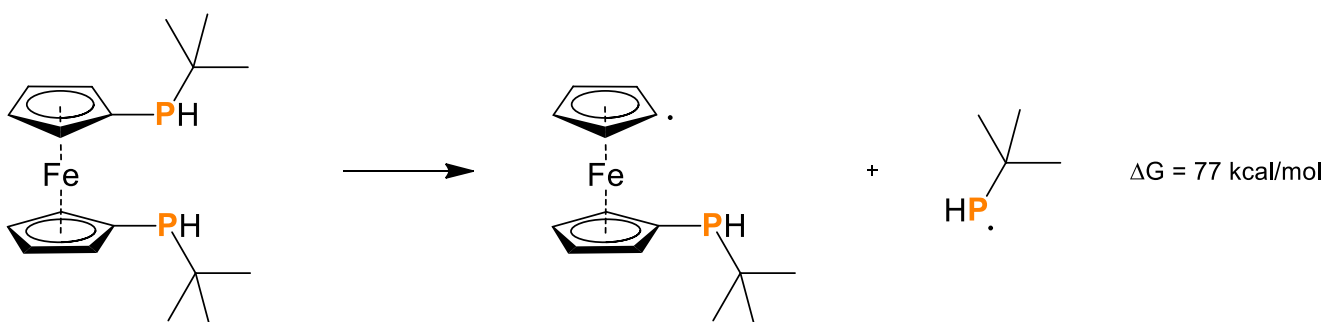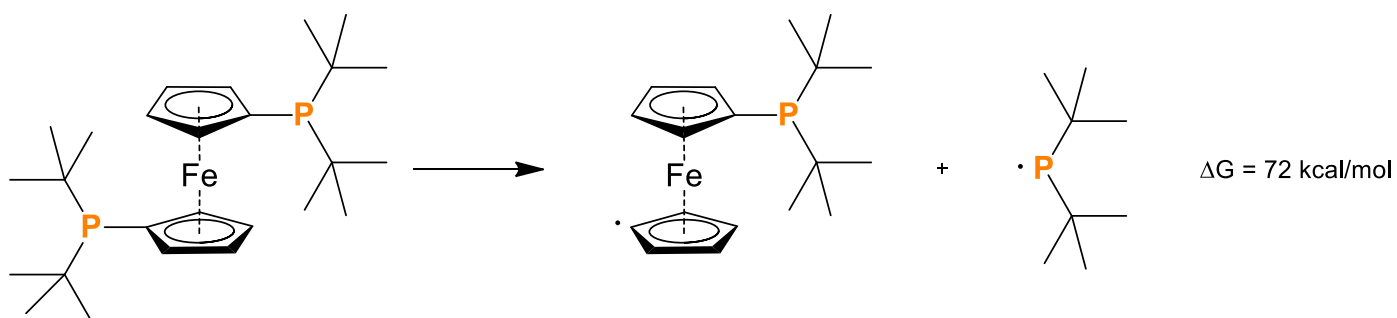

**Scheme S2.** The cleavage of the Fe–P bond in cases of **1** and **8**.

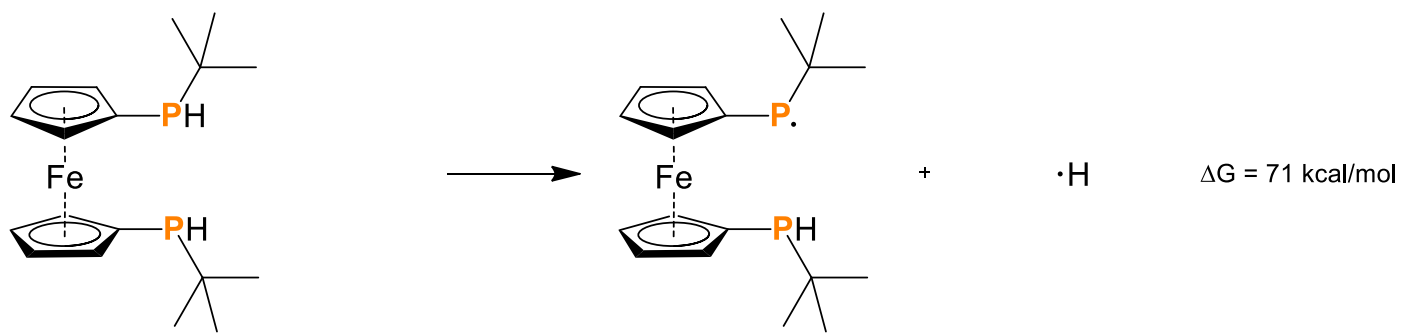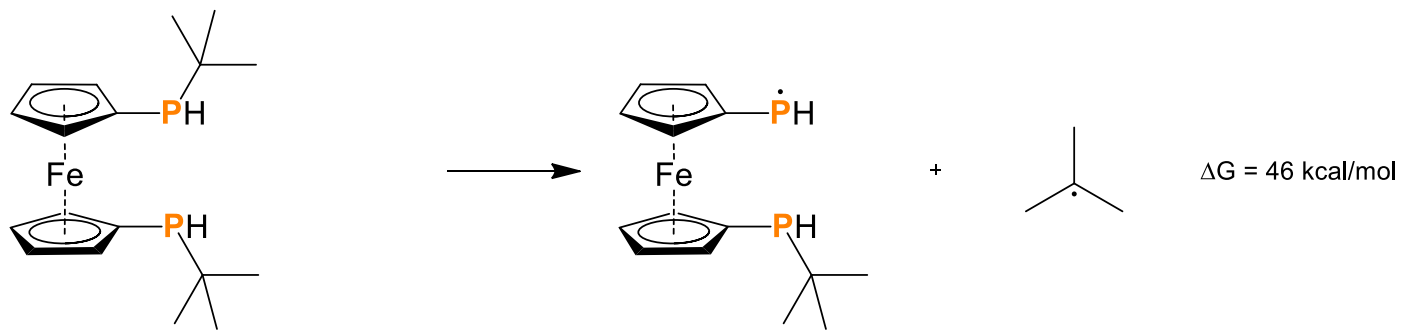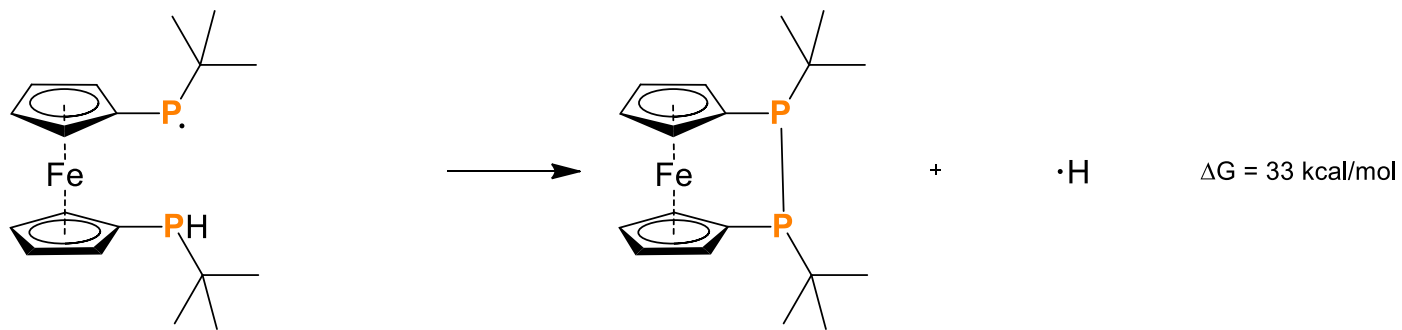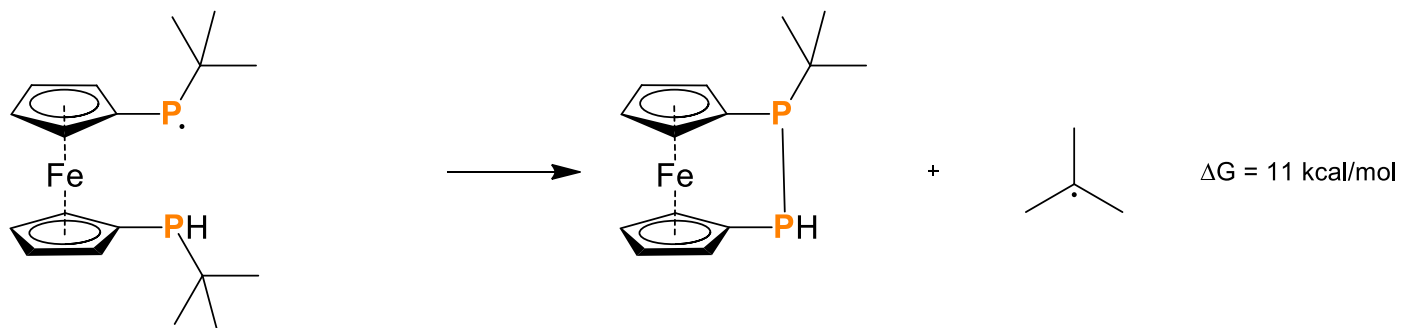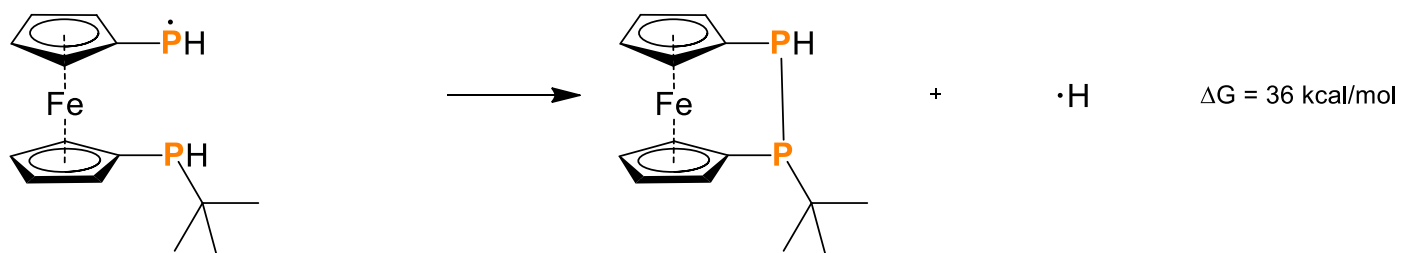

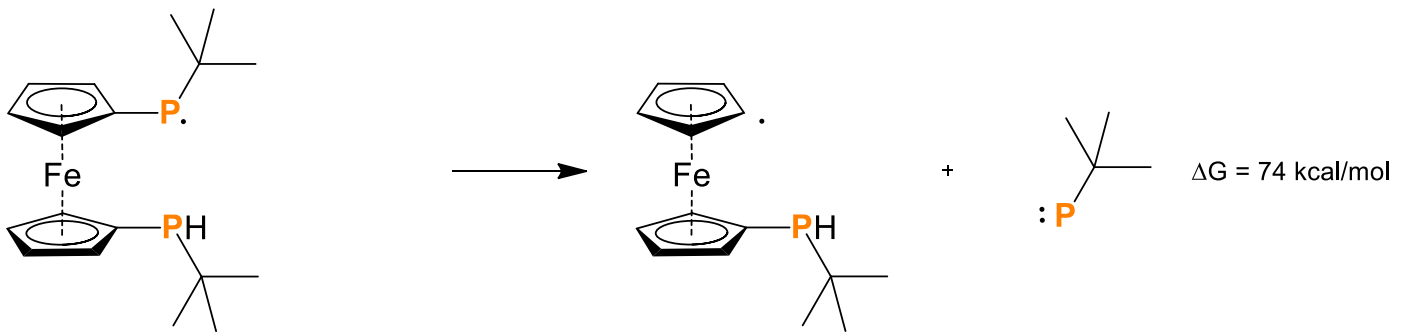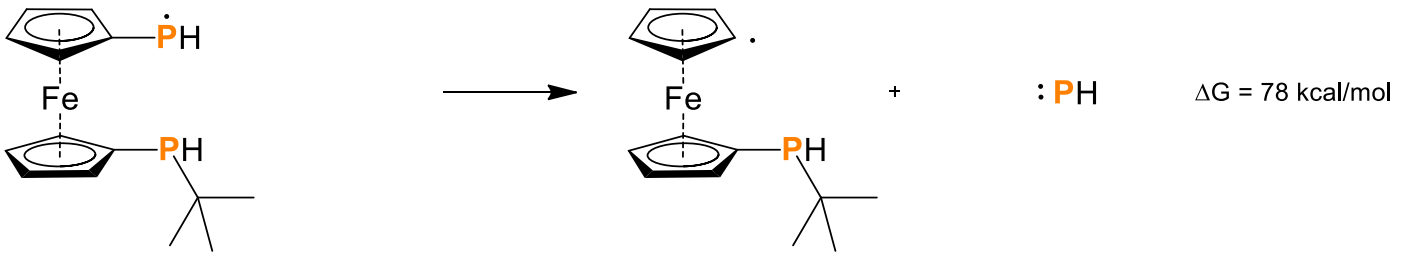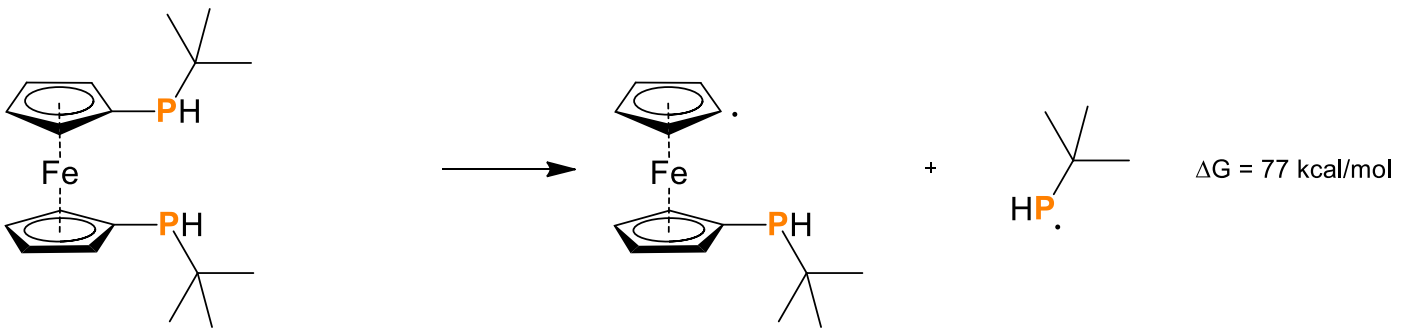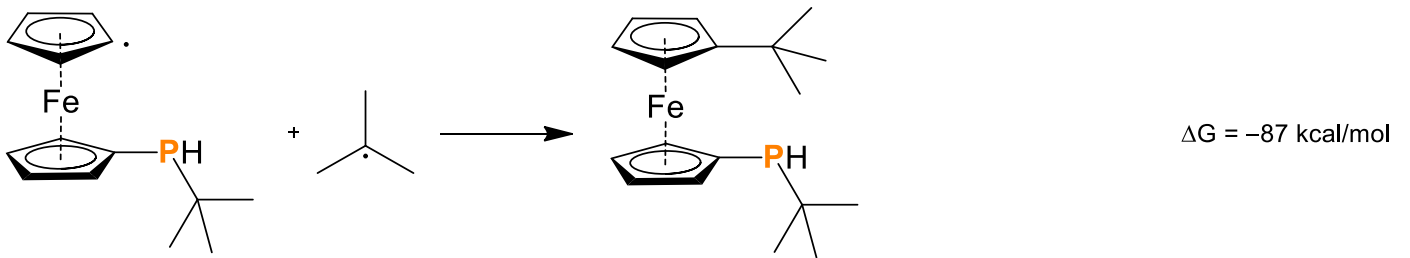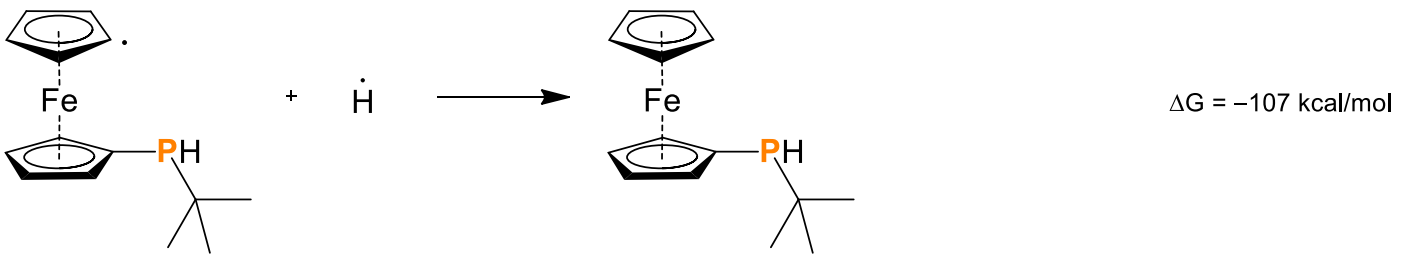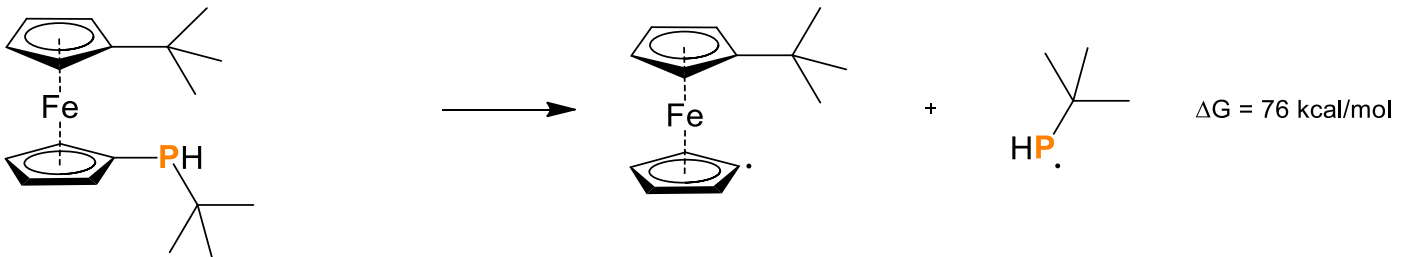

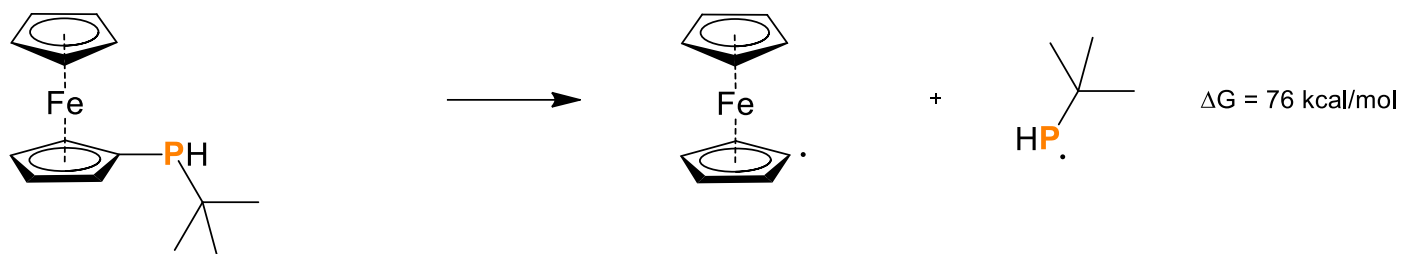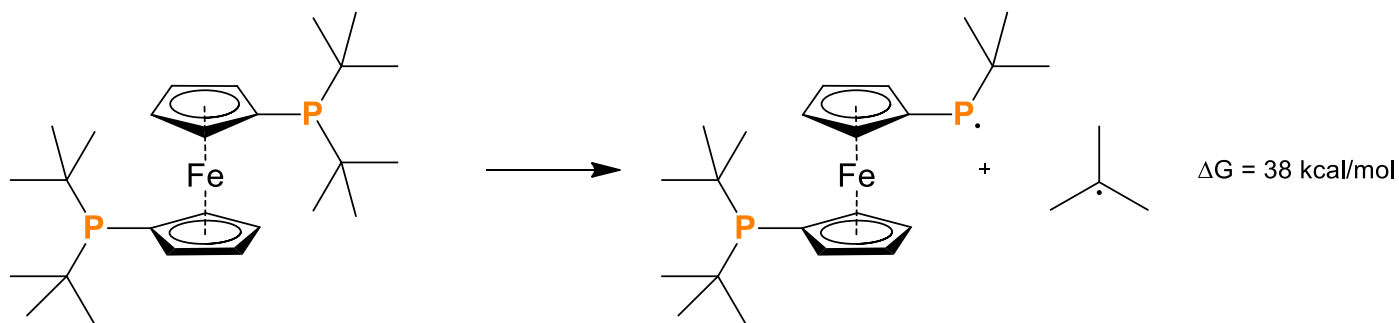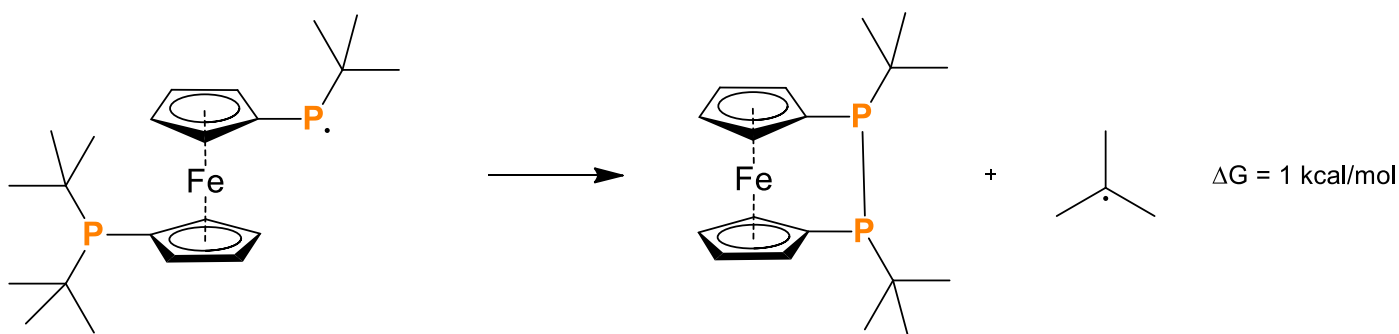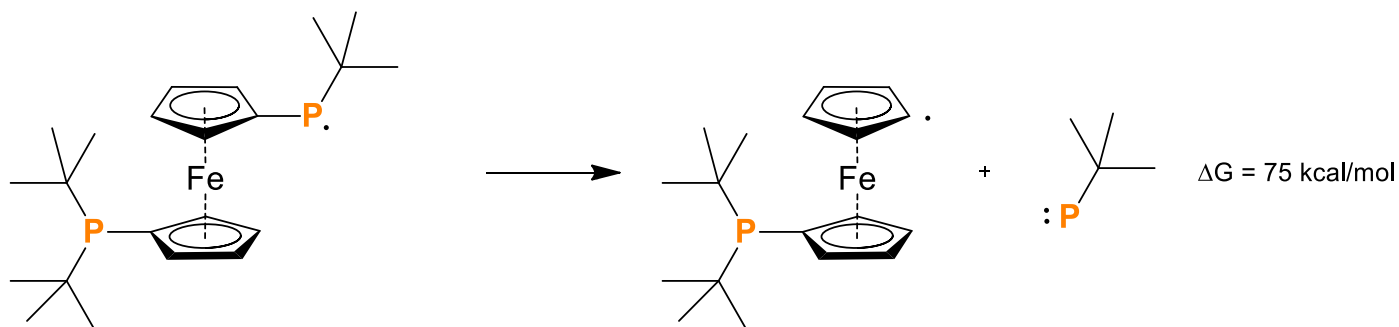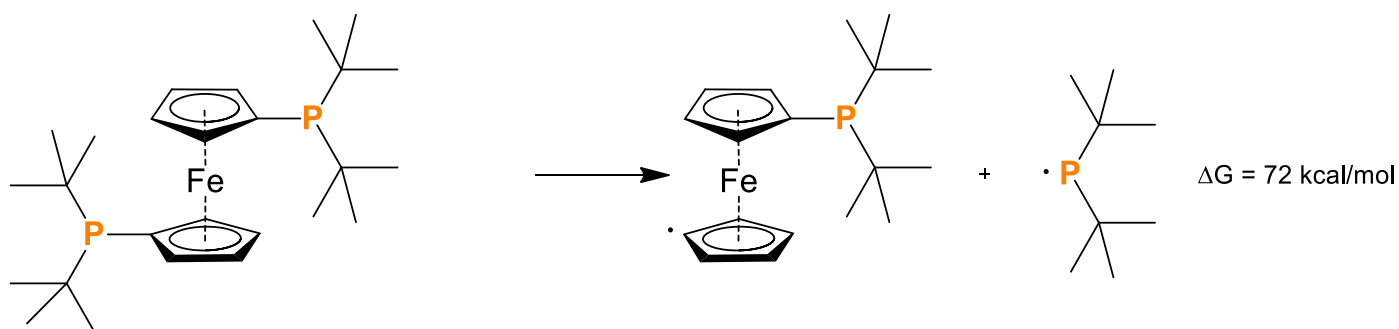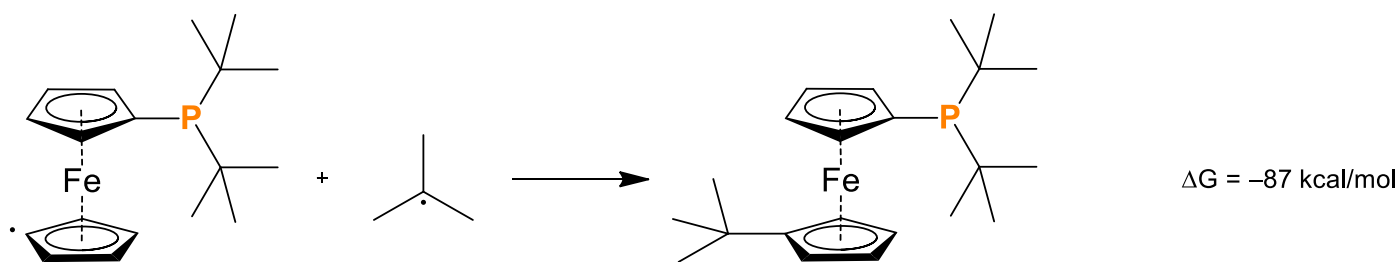

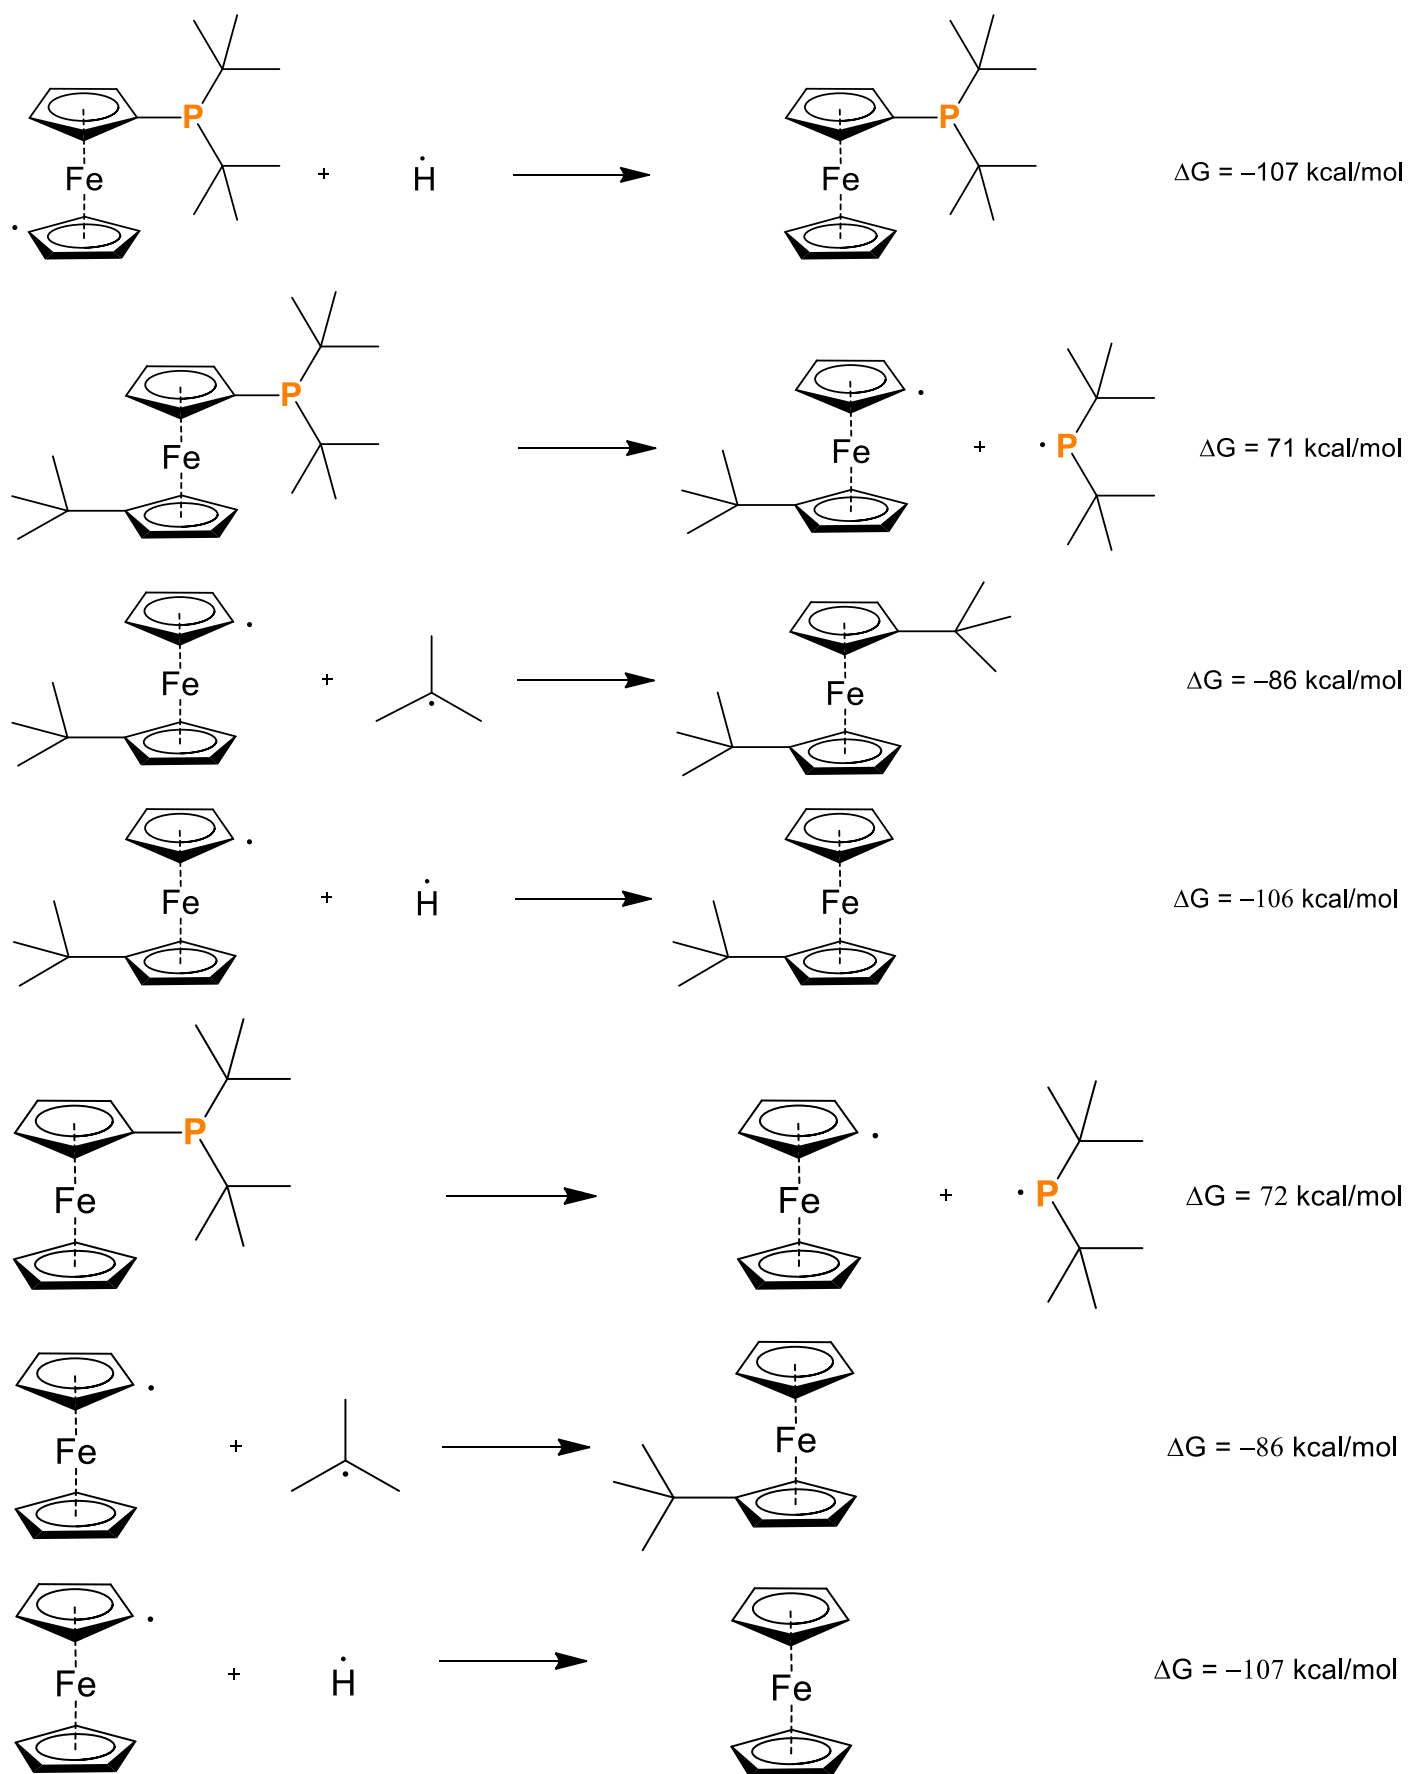

**Scheme S3.** The investigated alternative pathways.

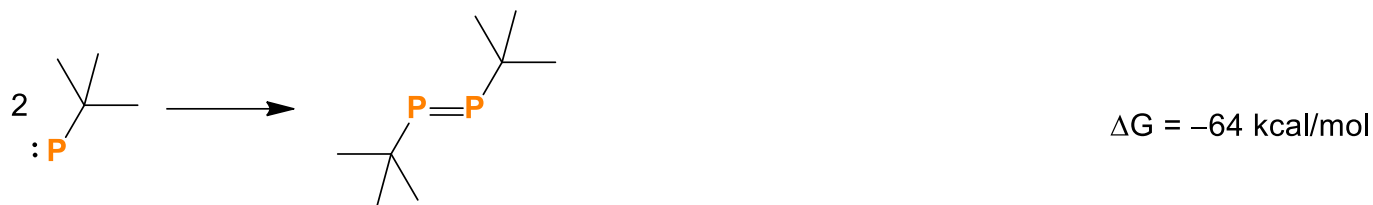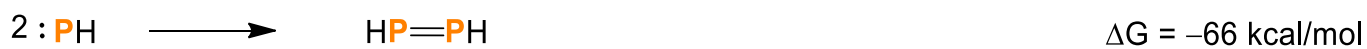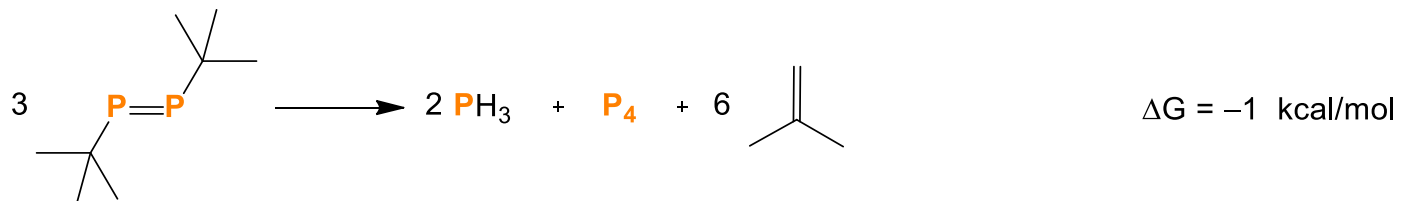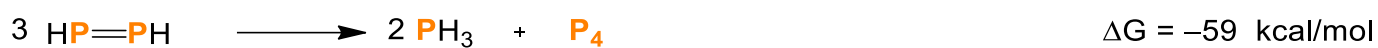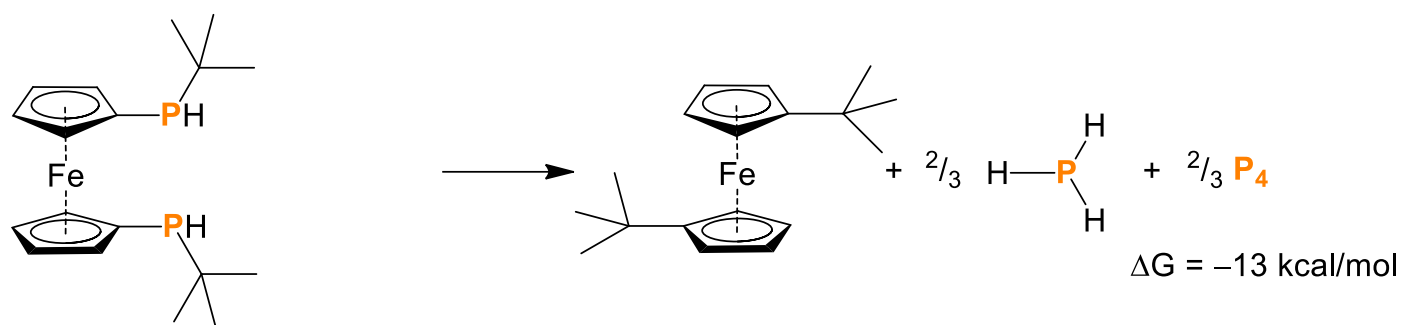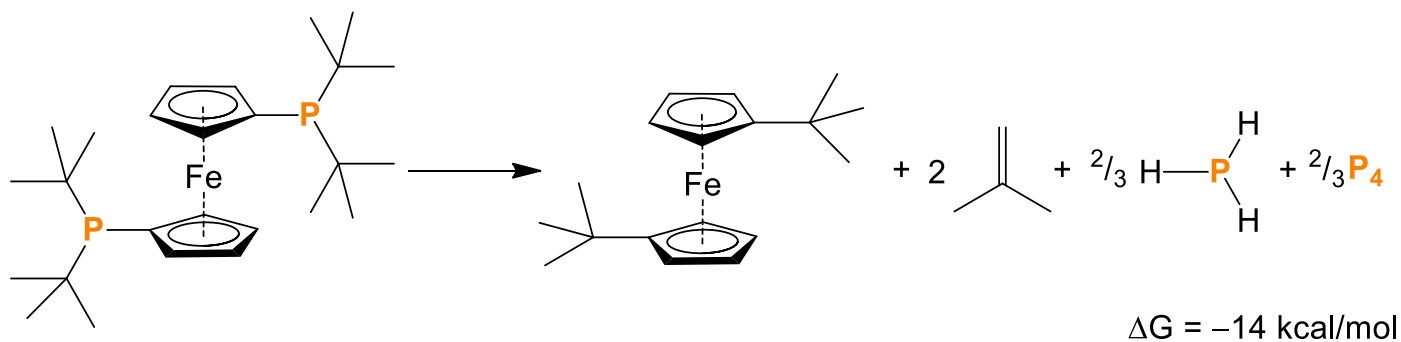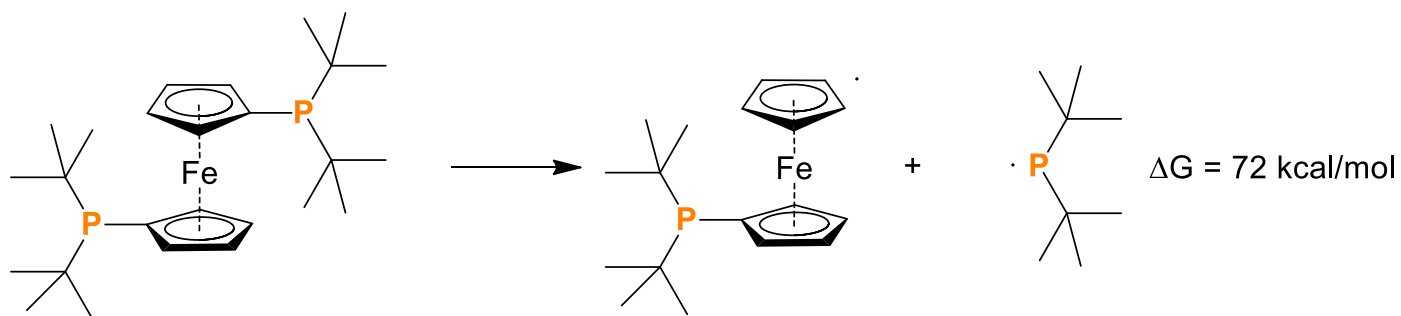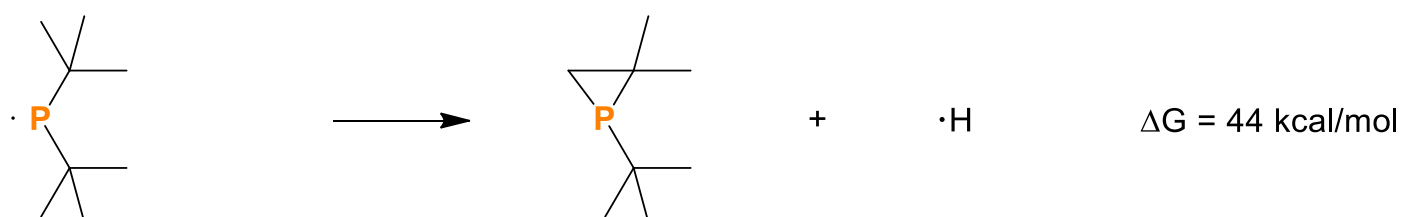

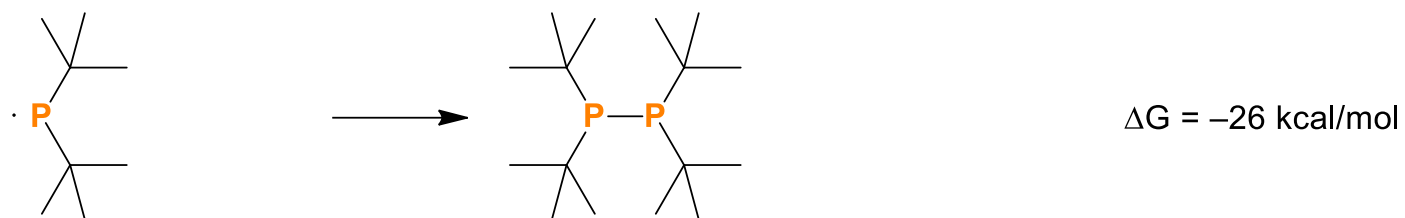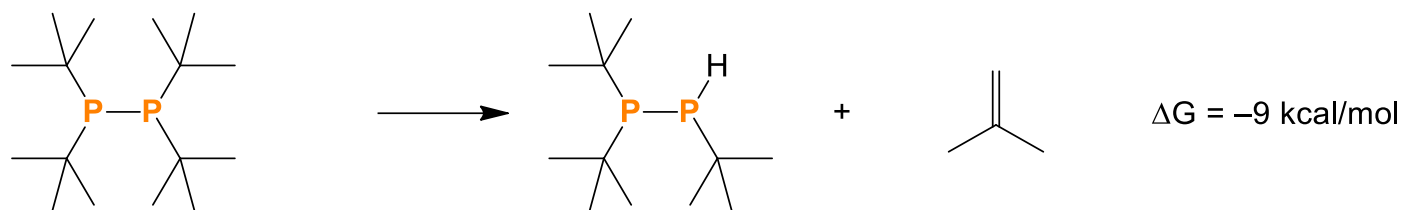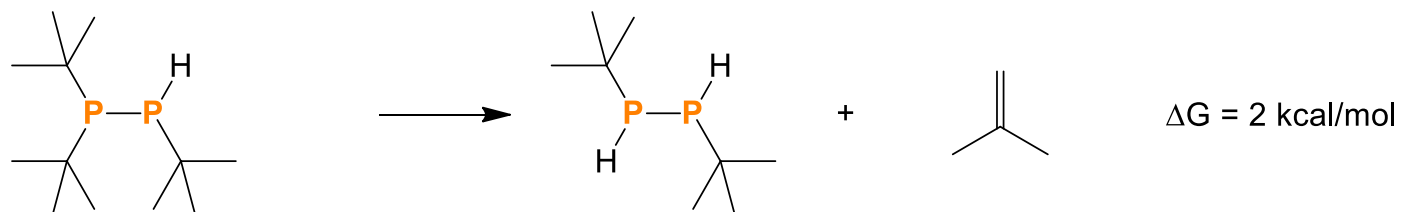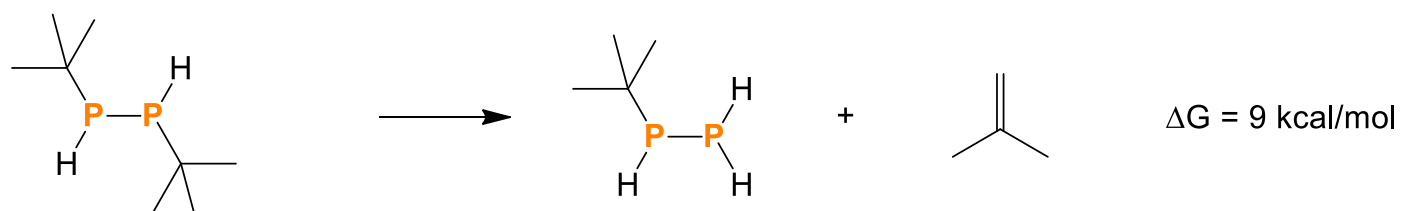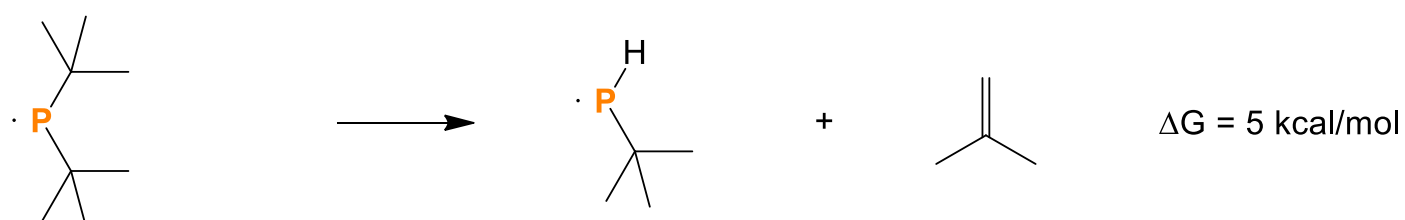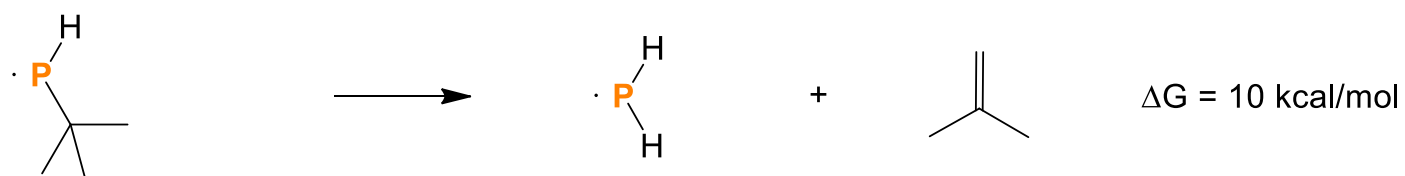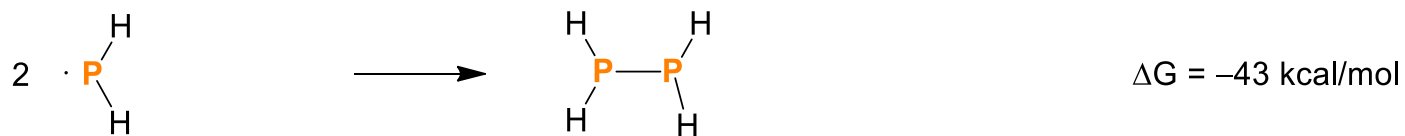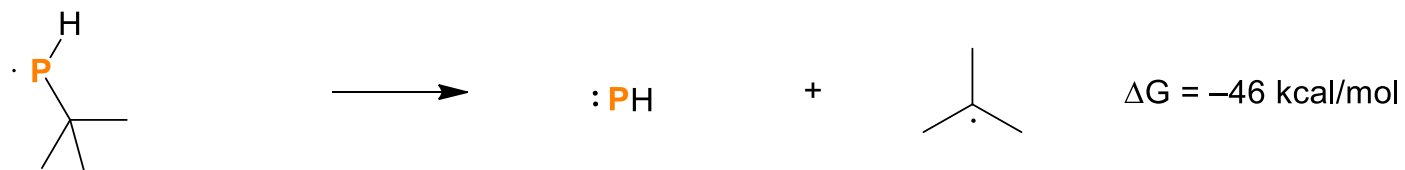

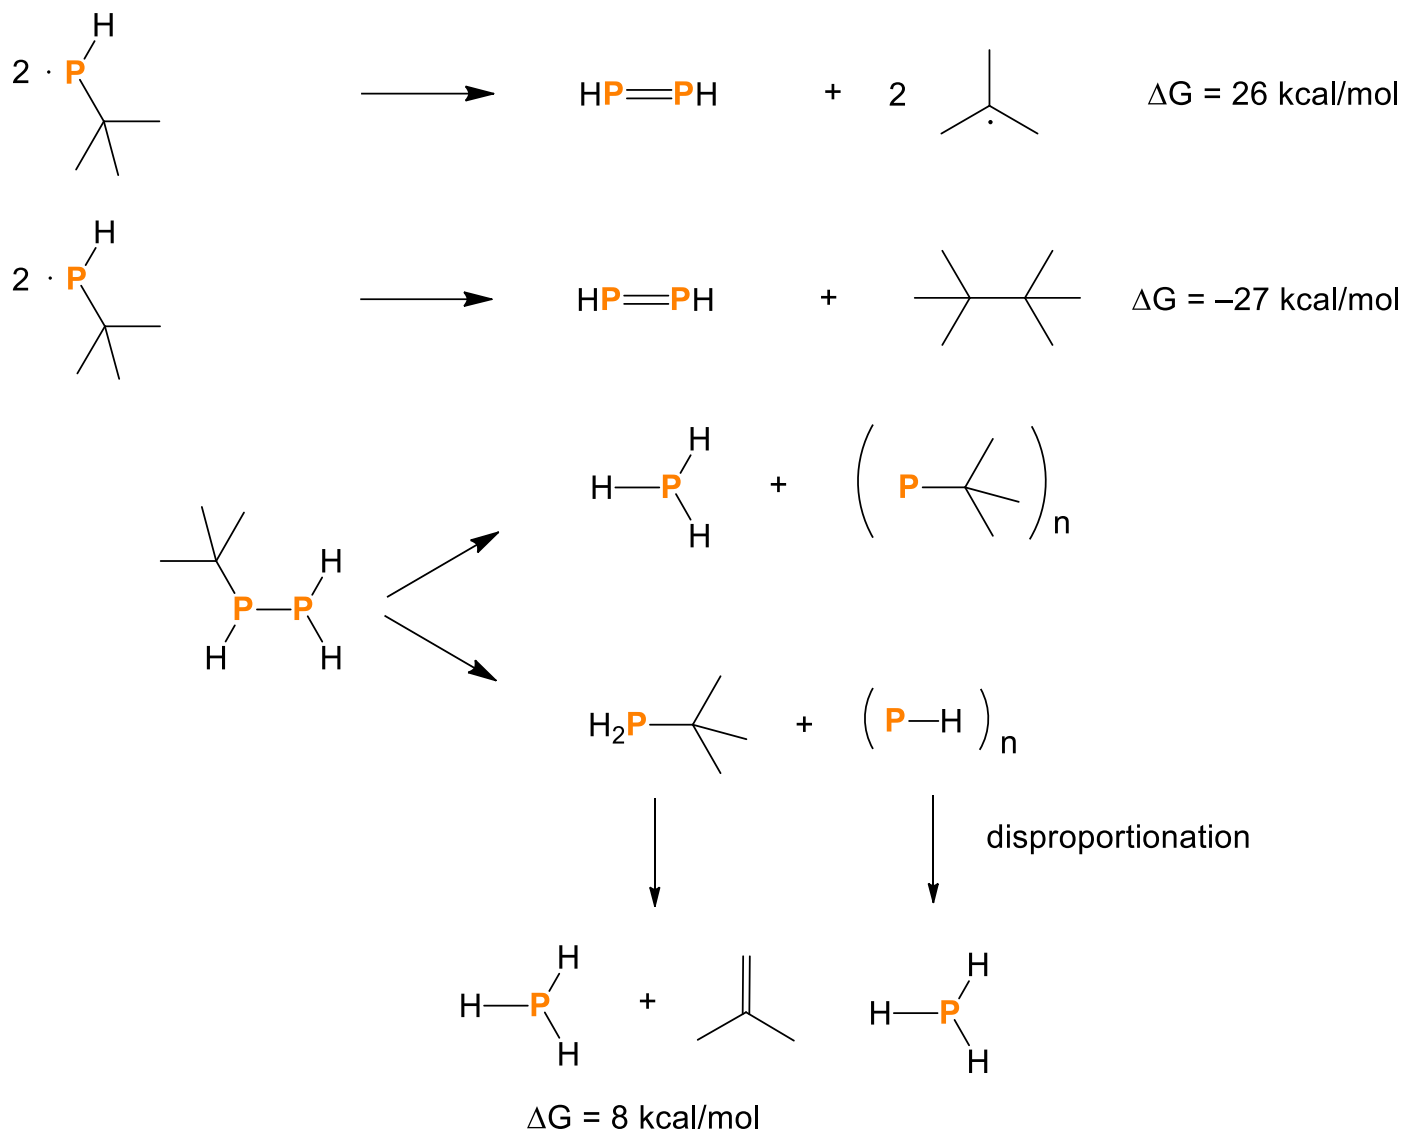

**Scheme S4.** The considered reaction paths result in volatile phosphorus-containing products.

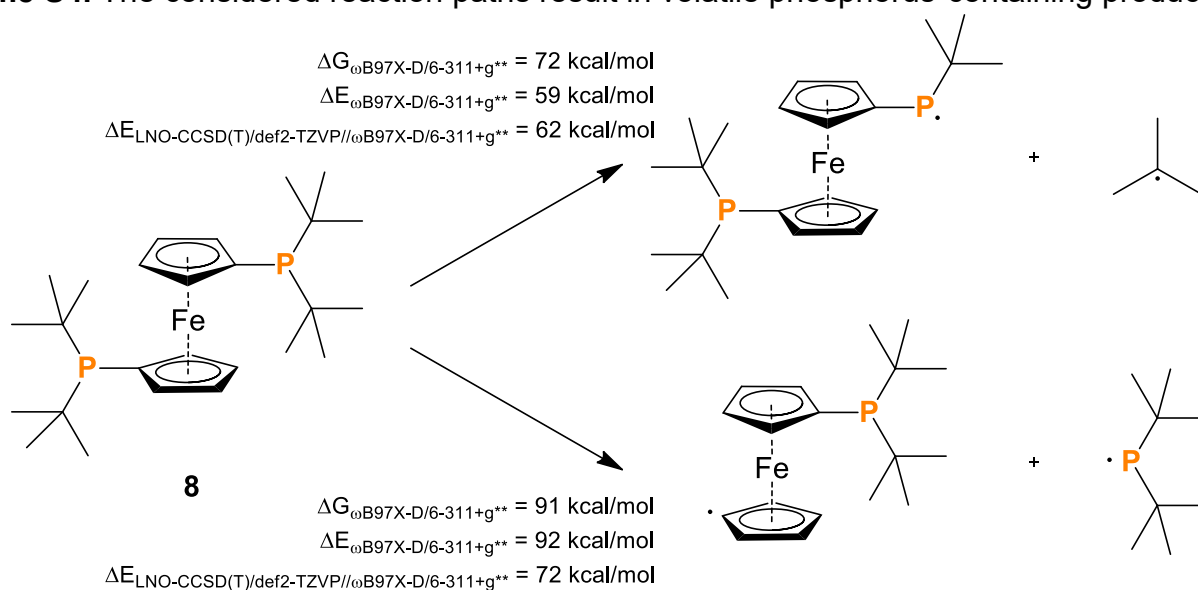

**Scheme S5.** Thermodynamic profile of the thermal decomposition pathways of  $\text{Fc}'(\text{PtBu}_2)_2$  (computed at the  $\omega\text{B97X-D/6-311+G}^{**}$  level of theory, with LNO-CCSD(T)/def2-TZVP single-point energies evaluated on  $\omega\text{B97X-D/6-311+G}^{**}$  optimized geometries)

## References

- [1] S. Dey, B. Szathmari, R. Franz, C. Bruhn, Z. Kelemen, R. Pietschnig, *Chem. Eur. J.* **2024**, *30*, e202400194.
